# Supplementary material
Source: publisher figshare collection journal article supplement (https://acs.figshare.com/ndownloader/files/9852004)
Supplement: Supplementary file 1 [file 9852004]

## *Supporting information*

# Aerosol crosslinked crown ether diols melded with poly(vinyl alcohol) as specialized microfibrous Li<sup>+</sup> adsorbents

*Lawrence A. Limjuco,<sup>†a</sup> Grace M. Nisola,<sup>†a</sup> Rey Eliseo C. Torrejos,<sup>†a</sup> Jeong Woo Han,<sup>b</sup> Ho Seong Song,<sup>b</sup> Khino J. Parohinog,<sup>a</sup> Sangho Koo,<sup>c</sup> Seong-Poong Lee,<sup>\*a</sup> Wook-Jin Chung<sup>\*a</sup>*

<sup>a</sup>Energy and Environment Fusion Technology Center (E<sup>2</sup>FTC), Department of Energy Science and Technology (DEST), Myongji University, Myongji-ro 116, Cheoin-gu, Yongin City, Gyeonggi Province, Republic of Korea (17058)

<sup>b</sup>Department of Chemical Engineering, University of Seoul, South Korea (02504)

<sup>c</sup>Department of Chemistry, Myongji University, Myongji-ro 116, Cheoin-gu, Yongin City, Gyeonggi Province, Republic of Korea (17058)

<sup>†</sup>co-first authors

*Corresponding authors:*

*\*(W.-J. Chung) wjc0828@gmail.com; \*(S.-P. Lee) spleemju2012@gmail.com.*

*Tel.: (82)-31-330-6687; Fax: (82)-31-337-2902*

## Supporting Information (SI) Contents

| <i>Number</i>    | <i>Title</i>                                                                                                                                                                          | <i>Page</i> |
|------------------|---------------------------------------------------------------------------------------------------------------------------------------------------------------------------------------|-------------|
|                  | <b>Materials and reagents used in the study</b>                                                                                                                                       | S–6         |
|                  | <b>CE diol synthesis protocol</b>                                                                                                                                                     |             |
| <b>Figure S1</b> | Synthesis scheme of CE diols. (a) 2-step preparation of CE 1 via intermediate <b>A</b> ; (b) intermolecular cyclization of various bis-epoxides with catechol for CE 2 and CE 3.      | S–7         |
|                  | <b><sup>1</sup>H and <sup>13</sup>C NMR spectra of CE diols</b>                                                                                                                       |             |
| <b>Figure S2</b> | <sup>1</sup> H and <sup>13</sup> C NMR spectra of CE 1 intermediate: 1,1-phenyldioxy-bis(2,3-epoxypropane) denoted as CE 1 intermediate <b>A</b> .                                    | S–8         |
| <b>Figure S3</b> | <sup>1</sup> H and <sup>13</sup> C NMR spectra of CE 1: 6,7,8,15,16,17-hexahydrodibenzo[1,4,8,11] tetraoxacyclotetradecine-7,16-diol denoted as <b>2HDB14C4</b> .                     | S–9         |
| <b>Figure S4</b> | <sup>1</sup> H and <sup>13</sup> C NMR spectra of CE 2: 7,7-dimethyl-3,4,6,7,8,10,11,12-octahydro-2H- benzo[1,4,8,12]tetraoxacyclopentadecine-3,11-diol denoted as <b>2HB2M15C4</b> . | S–10        |
| <b>Figure S5</b> | <sup>1</sup> H and <sup>13</sup> C NMR spectra of CE 3: 2,3,4,6,7,8,9,11,12,13-decahydrobenzo[1,4,8,13] tetraoxacyclohexadecine-3,12-diol denoted as <b>2HB16C4</b> .                 | S–11        |
|                  | <b>Electrospinning conditions</b>                                                                                                                                                     |             |
| <b>Table S1</b>  | Electrospinning conditions for the fabrication of MF adsorbents.                                                                                                                      | S–12        |
|                  | <b>Synthesis of methylated CEs (mCEs) for control MF samples</b>                                                                                                                      |             |
| <b>Figure S6</b> | Synthesis scheme of methylated CEs via etherification.                                                                                                                                | S–13        |
|                  | <b>Characterization results of mCE compounds</b>                                                                                                                                      |             |
| <b>Figure S7</b> | FTIR spectra of methylated CEs (mCE 1 – 3).                                                                                                                                           | S–14        |
| <b>Figure S8</b> | <sup>1</sup> H and <sup>13</sup> C NMR spectra of <b>mCE 1</b> : 7,16-dimethoxy-6,7,8,15,16,17-hexahydrodibenzo[b,i][1,4,8,11]tetraoxacyclotetradecine.                               | S–15        |
| <b>Figure S9</b> | <sup>1</sup> H and <sup>13</sup> C NMR spectra of <b>mCE 2</b> : 3,11-dimethoxy-7,7-dimethyl-3,4,6,7,8,10,11,12-octahydro-2H-benzo[b][1,4,8,12]tetraoxacyclopentadecine.              | S–16        |

|                   |                                                                                                                                                         |      |
|-------------------|---------------------------------------------------------------------------------------------------------------------------------------------------------|------|
| <b>Figure S10</b> | $^1\text{H}$ and $^{13}\text{C}$ NMR spectra of <b>mCE 3</b> : 3,12-dimethoxy-2,3,4,6,7,8,9,11,12,13-ecahydrobenzo[b][1,4,8,13]tetraoxacyclohexadecine. | S–17 |
|                   | <b>Calculations for MF stability tests</b>                                                                                                              | S–18 |
| <b>Table S2</b>   | List of equations used for the stability tests.                                                                                                         | S–19 |
|                   | <b>Actual composition of MFs used for adsorption studies</b>                                                                                            | S–18 |
|                   | <b>Calibration curves for PVA and CE concentrations in elution tests</b>                                                                                |      |
| <b>Figure S11</b> | Calibration Curve for PVA [as C] via TOC analysis.                                                                                                      | S–20 |
| <b>Figure S12</b> | UV-Vis spectra of mCEs and CE diols with no interference from PVA.                                                                                      | S–20 |
| <b>Figure S13</b> | Constructed standard curves for CE diols using UV-Vis spectrophotometry (5 – 100 mg L <sup>-1</sup> ).                                                  | S–21 |
| <b>Figure S14</b> | Constructed standard curves for methylated CEs (mCEs) using UV-Vis spectrophotometry (5 – 100 mg L <sup>-1</sup> ).                                     | S–21 |
|                   | <b>Sample UV-Vis spectra of elution samples</b>                                                                                                         |      |
| <b>Figure S15</b> | Sample UV-Vis spectra of eluent samples from CE/PVA and mCE/PVA MFs. A spectrum for GA aqueous solution is overlaid.                                    | S–22 |
| <b>Table S3</b>   | Integrated FTIR peaks and corresponding ratios.                                                                                                         | S–23 |
|                   | <b>Elution test results and actual compositions of MFs used for adsorption experiments</b>                                                              |      |
| <b>Table S4</b>   | Swelling ratio and measurements for the stability test of pure PVA, CE/PVA and mCE/PVA MFs.                                                             | S–24 |
| <b>Table S5</b>   | Component losses (CE and PVA) during elution tests and the final composition of MF samples used for adsorption experiments.                             | S–24 |
|                   | <b><math>^{13}\text{C}</math> CP/MAS NMR results and peak interpretation</b>                                                                            | S–25 |
| <b>Figure S16</b> | $^{13}\text{C}$ CP/MAS NMR of pure PVA MF.                                                                                                              | S–26 |
| <b>Table S6</b>   | Chemical shifts from $^{13}\text{C}$ CP/MAS NMR and peak assignments for pure PVA MF.                                                                   | S–26 |
| <b>Figure S17</b> | $^{13}\text{C}$ CP/MAS NMR of CE 1/PVA MF.                                                                                                              | S–27 |

|                   |                                                                                       |      |
|-------------------|---------------------------------------------------------------------------------------|------|
| <b>Table S7</b>   | Chemical shifts from $^{13}\text{C}$ CP/MAS NMR and peak assignments for CE 1/PVA MF. | S–27 |
| <b>Figure S18</b> | $^{13}\text{C}$ CP/MAS NMR of CE 2/PVA MF.                                            | S–28 |
| <b>Table S8</b>   | Chemical shifts from $^{13}\text{C}$ CP/MAS NMR and peak assignments for CE 2/PVA MF  | S–28 |
| <b>Figure S19</b> | $^{13}\text{C}$ CP/MAS NMR of CE 3/PVA MF.                                            | S–29 |
| <b>Table S9</b>   | Chemical shifts from $^{13}\text{C}$ CP/MAS NMR and peak assignments for CE 3/PVA MF  | S–29 |

### Broad bands at 70 ppm region

|                   |                                                                                                                                                 |      |
|-------------------|-------------------------------------------------------------------------------------------------------------------------------------------------|------|
| <b>Figure S20</b> | Chemical shift predications of $\text{CH}_2\text{-CH}_2$ in CE rings and $\alpha\text{-Cs}$ in crosslinked PVA and CEs using MestRenova 11.0.2. | S–30 |
|-------------------|-------------------------------------------------------------------------------------------------------------------------------------------------|------|

### Morphology of uncrosslinked electrospun MFs

|                   |                                                                                                                        |      |
|-------------------|------------------------------------------------------------------------------------------------------------------------|------|
| <b>Figure S21</b> | FE-SEM images of MFs before aerosol crosslinking (a) pure PVA and CE/PVA containing: (b) CE 1, (c) CE 2, and (d) CE 3. | S–32 |
|-------------------|------------------------------------------------------------------------------------------------------------------------|------|

### Surface analysis and mechanical test results of MF samples

|                   |                                                                                                                                                                                            |      |
|-------------------|--------------------------------------------------------------------------------------------------------------------------------------------------------------------------------------------|------|
| <b>Figure S22</b> | Surface and mechanical properties of MF samples. (a) $\text{N}_2$ adsorption-desorption isotherms (Inset: pore size distribution); (b) Tensile strength, % elongation and Young's modulus. | S–33 |
|-------------------|--------------------------------------------------------------------------------------------------------------------------------------------------------------------------------------------|------|

### Adsorption properties

|                   |                                                                                                                                                                                                                                                             |      |
|-------------------|-------------------------------------------------------------------------------------------------------------------------------------------------------------------------------------------------------------------------------------------------------------|------|
| <b>Figure S23</b> | Adsorption results at varied solution pH ( $C_0 = 7.35 \text{ mg L}^{-1}$ ; $m \cong 30 \text{ mg}$ ; $V = 50 \text{ mL}$ ; $T = 30^\circ\text{C}$ ).                                                                                                       | S–35 |
| <b>Figure S24</b> | Kinetic rate models for $\text{Li}^+$ adsorption in CE/PVA and pure PVA MFs: (a) pseudo-first and (b) pseudo-second order. ( $C_0 = 7.35 \text{ mg L}^{-1}$ ; $m \cong 30 \text{ mg}$ ; $V = 50 \text{ mL}$ ; $T = 30^\circ\text{C}$ ; $\text{pH} = 8.1$ ). | S–36 |
| <b>Table S10</b>  | $\text{Li}^+$ adsorption performance of inorganic LIS reported in literature.                                                                                                                                                                               | S–37 |
| <b>Table S11</b>  | Theoretical adsorption capacities of pure CEs.                                                                                                                                                                                                              | S–38 |
| <b>Figure S25</b> | Isotherm models for $\text{Li}^+$ adsorption in CE/PVA and pure PVA MFs: (a) Freundlich and (b) Langmuir. ( $C_0 = 3 - 70 \text{ mg L}^{-1}$ ; $m \cong 30 \text{ mg}$ ; $V = 50 \text{ mL}$ ; $T = 30^\circ\text{C}$ ; $\text{pH} = 8.0$ ).                | S–39 |
| <b>Table S12</b>  | $\text{Li}^+$ adsorption performance of CE-based $\text{Li}^+$ adsorbents reported in literature.                                                                                                                                                           | S–40 |

### Density Functional Theory calculations

|                   |                                                                                                                |      |
|-------------------|----------------------------------------------------------------------------------------------------------------|------|
| <b>Table S13</b>  | Average opposite O distances, $[O-O]_{ave}$ before and after complexation of CEs with $M^{n+}$ .               | S-41 |
| <b>Table S14</b>  | O- $M^{n+}$ distances ( $\text{\AA}$ ) of CE- $M^{n+}$ complexes calculated using DFT PBE-PAW level of theory. | S-42 |
| <b>Figure S26</b> | Lowest energy conformation of free and 1:1 CE- $M^{n+}$ complexed optimized using DFT PBE-PAW level of theory. | S-43 |

### Exothermicity of exchange of reactions

|                  |                                                                                                |      |
|------------------|------------------------------------------------------------------------------------------------|------|
| <b>Table S15</b> | Binding enthalpies ( $\Delta H$ ) for the $M^{n+}$ (CE) complexes.                             | S-44 |
| <b>Table S16</b> | Binding enthalpies ( $\Delta H$ ) for the $M^{n+}(H_2O)_n$ where $n=6$ .                       | S-44 |
| <b>Table S17</b> | $\Delta H_n$ values of $M^{n+}$ relative to $Li^+$ ( $\Delta H_n = 0 \text{ kcal mol}^{-1}$ ). | S-45 |

### Recycling experiments

|                   |                                                                                                                                                                                                                                                           |      |
|-------------------|-----------------------------------------------------------------------------------------------------------------------------------------------------------------------------------------------------------------------------------------------------------|------|
| <b>Figure S27</b> | Cycled $Li^+$ adsorption/desorption runs for regenerability tests of the CE/PVA MFs: (a) CE 1/PVA (b) CE 2/PVA and (c) CE 3/PVA. ( $C_0 = 6.7 \text{ mg L}^{-1}$ ; $m \cong 30 \text{ mg}$ ; $V = 50 \text{ mL}$ ; $T = 30^\circ\text{C}$ ; $pH = 8.0$ ). | S-46 |
|-------------------|-----------------------------------------------------------------------------------------------------------------------------------------------------------------------------------------------------------------------------------------------------------|------|

### MF autopsy after five adsorption/desorption cycles

|                   |                                                                                                                                                                      |      |
|-------------------|----------------------------------------------------------------------------------------------------------------------------------------------------------------------|------|
| <b>Figure S28</b> | SEM images of used CE/PVA MFs after 5 <sup>th</sup> adsorption/desorption cycle: (a) CE 1/PVA (b) CE 2/PVA and (c) CE 3/PVA.                                         | S-47 |
| <b>Figure S29</b> | UV-Vis spectra of stripping solutions (0.5 M HCl) used to desorb $Li^+$ from spent CE/PVA MFs (for eluted CE detection): (a) CE 1/PVA (b) CE 2/PVA and (c) CE 3/PVA. | S-48 |

|                             |      |
|-----------------------------|------|
| <b>List of Nomenclature</b> | S-49 |
|-----------------------------|------|

|                                              |      |
|----------------------------------------------|------|
| <b>References for Supporting Information</b> | S-52 |
|----------------------------------------------|------|

### Materials and reagents used in the study

Bis-epoxide intermediates neopentyldiglycidyl ether (technical grade) and 1,4-bis(2,3-epoxypropyloxy)butane ( $\geq 95\%$ ) were procured from Sigma Aldrich (MO, USA). High purity grades (HPLC) of chloroform ( $\text{CHCl}_3$ , 99.8%), dichloromethane (DCM,  $> 99.9\%$ ), N,N-Dimethylformamide (DMF,  $> 99.9\%$ ) and methanol (MeOH, 99.9%) were obtained from Samchun Pure Chemical Co., Ltd. (South Korea) while extra pure tert-butanol (*t*-BuOH, 99.5%) and anhydrous magnesium sulfate ( $\text{MgSO}_4$ ,  $> 99\%$ ) were from Daejung Chemicals and Metals Co., Ltd. (South Korea). Reagents catechol ( $\geq 99\%$ ), epichlorohydrin ( $> 99\%$ ), lithium hydroxide ( $\text{LiOH}$ ,  $\geq 98\%$ ), iodomethane ( $\text{CH}_3\text{I}$ , 99.5%) and sodium hydride (60% NaH in mineral oil) were acquired from Sigma Aldrich (MO, USA). Sodium hydroxide ( $\text{NaOH}$ ,  $> 97\%$ ) and sodium carbonate ( $\text{Na}_2\text{CO}_3$ , 99.95% extra pure anhydrous) were purchased from Acros Organics (NJ, USA). All compounds for crown ether synthesis were used without further purification.

Polymeric binder PVA (98-99% hydrolyzed, average MW = 85,000-124,000 g mole<sup>-1</sup>) and glutaraldehyde crosslinker (grade II, 25% in  $\text{H}_2\text{O}$ ) were purchased from Sigma-Aldrich (MO, USA). Polyoxyethyleneoctyl phenyl ether (Triton X-100<sup>®</sup>) was from Acros Organics (USA). High purity acetone was purchased from Samchun Pure Chemicals Co., Ltd. (South Korea). Hydrochloric ( $\text{HCl}$ , RHM 35-37%) and nitric acid ( $\text{HNO}_3$  RHM 60%) were supplied by Junsei Chemical Co., Ltd. (Japan).  $\text{HCl}$  was used as crosslinking catalyst and as stripping agent for the desorption of metal ions in CE/PVA MFs. Meanwhile,  $\text{HNO}_3$  was used in acid digestion pre-treatment for elemental analysis. Lithium hydroxide ( $\text{LiOH}$   $\geq 98\%$ ) from Sigma-Aldrich (MO, USA) and lithium chloride ( $\text{LiCl}$   $\geq 98\%$ ) from Fluka (Switzerland) were used for the preparation of simulated  $\text{Li}^+$  solutions for adsorption experiments. Real sample of seawater collected from Pyeongtaek, South Korea was spiked with  $\text{Li}^+$  and used for selectivity experiments.

### CE diol synthesis protocol

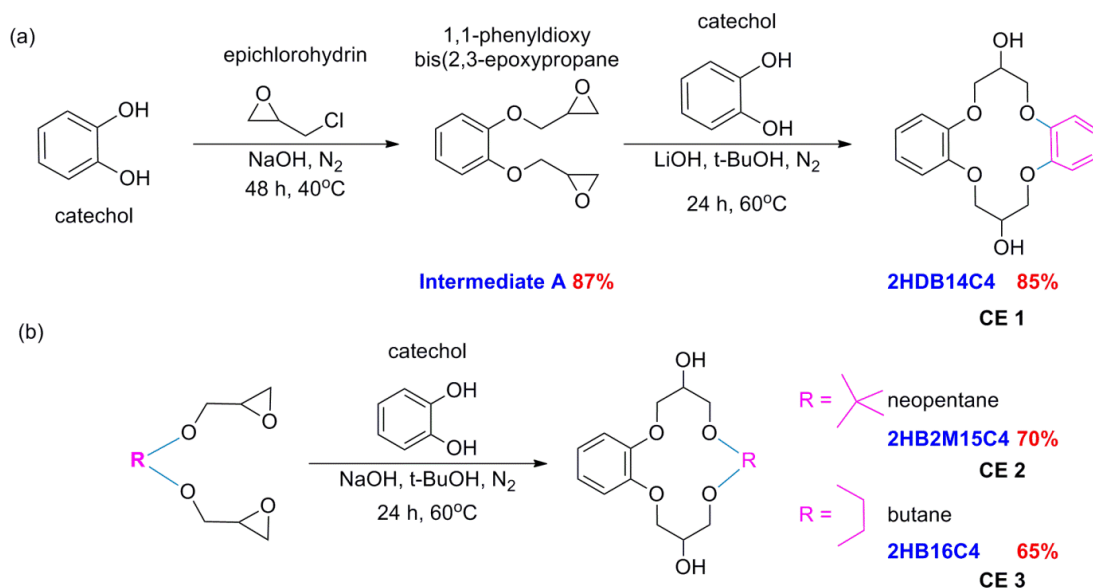

**Figure S1.** Synthesis scheme of CE diols. (a) 2-step preparation of CE 1 via intermediate A; (b) intermolecular cyclization of various bis-epoxides with catechol for CE 2 and CE 3.

The bis-epoxide intermediate A (1,1-phenyldioxy bis(2,3-epoxypropane)) for CE 1 (2HDB14C4) was obtained from the reaction of (0.1 mol) catechol and (4 equiv., 0.4 mol) epichlorohydrin in the presence of NaOH (0.4 mL, 10 N) under N<sub>2</sub> blanket at 40°C for 48 h (Figure S1a).<sup>1</sup> After cooling, NaOH (42 mL, 5 N) saturated with Na<sub>2</sub>CO<sub>3</sub> was added and the mixture was stirred vigorously at room temperature for 20 h. The aqueous layer was extracted twice with CHCl<sub>3</sub> and the combined organic layers were washed and concentrated. The crude product was purified via silica gel column chromatography using DCM as eluent which afforded 87% yield. Meanwhile, bis-epoxides for CE 2 (2HB2M15C4) and CE 3 (2HB16C4) were commercially available and used as received.

Cyclization of CE diols (Figure S1a, S1b) was performed via reaction of catechol with respective bis-epoxide upon its intramolecular ring opening.<sup>2,3</sup> Ring closures for CE diols were metal ion template-assisted using metal hydroxides (LiOH or NaOH). Briefly, catechol (5 mmol) and appropriate metal hydroxide (2 equiv., 10 mmol) were dissolved in *t*-BuOH (50 mL) at 60°C under N<sub>2</sub> blanket. Upon complete dissolution, respective bis-epoxide intermediate (1 equiv., 5 mmol) was added within 1 h and the reaction was continuously stirred for 24 h at 60°C. After the reaction, the solvent was evaporated *in vacuo* and the residue was dissolved in CHCl<sub>3</sub>. The organic layer was washed with 0.5 N NaOH and finally with water. The water layers were back-extracted with CHCl<sub>3</sub>, and the combined CHCl<sub>3</sub> layers were dried over MgSO<sub>4</sub>, filtered and evaporated *in vacuo*. Crude products were dissolved in CHCl<sub>3</sub> and purified using silica gel (Merck, 0.035-0.070 mm, 60Å) chromatography with a short alumina (Al<sub>2</sub>O<sub>3</sub>, Brockman activity I) bed on top (5:1 v/v SiO<sub>2</sub>-Al<sub>2</sub>O<sub>3</sub>) using CHCl<sub>3</sub>/MeOH as eluent.

<sup>1</sup>H/<sup>13</sup>C NMR spectra of all products are provided as supplementary Figures S2-S5 whereas FTIR spectra of all CE diols were shown in Figure 2 of the main article.

# <sup>1</sup>H and <sup>13</sup>C NMR spectra of CE diols

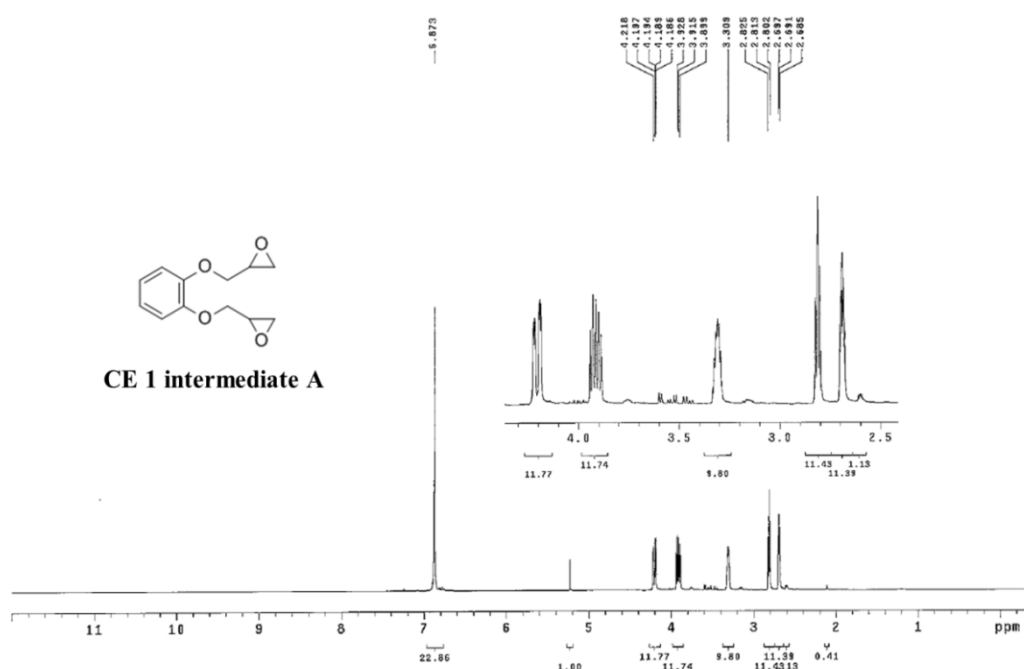

<sup>1</sup>H NMR (CDCl<sub>3</sub>, 400 MHz): (δ, ppm) 2.68-2.70 (m, 2 H, -CH<sub>2</sub>-), 2.80-2.83 (m, 2 H, -CH<sub>2</sub>-), 3.30-3.32 (m, 2H, -CH-), 3.89-3.94 (m, 2H, -CH-), 4.19-4.23 (m, 4H, -CH<sub>2</sub>-), 6.87 (m, 4H, ArH).

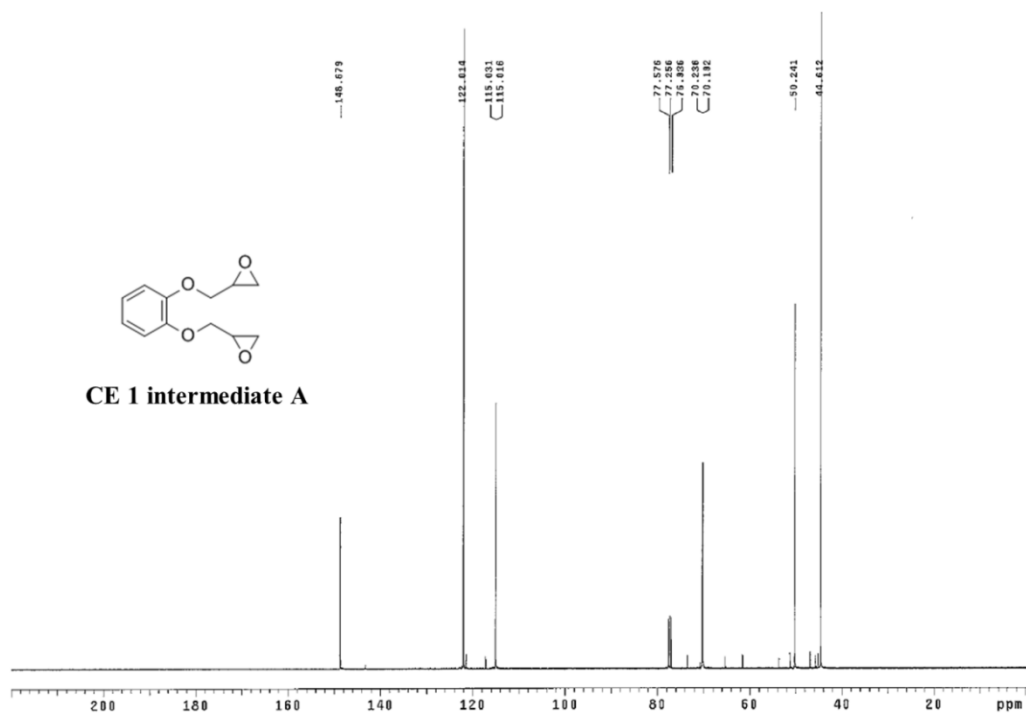

<sup>13</sup>C NMR (CDCl<sub>3</sub>, 100 MHz): (δ, ppm) 44.61, 50.24, 70.19, 70.24, 115.02, 115.03, 112.01, 148.68

**Figure S2.** <sup>1</sup>H and <sup>13</sup>C NMR spectra of CE 1 intermediate: 1,1-phenyldioxy-bis(2,3-epoxypropane) denoted as CE 1 intermediate A.



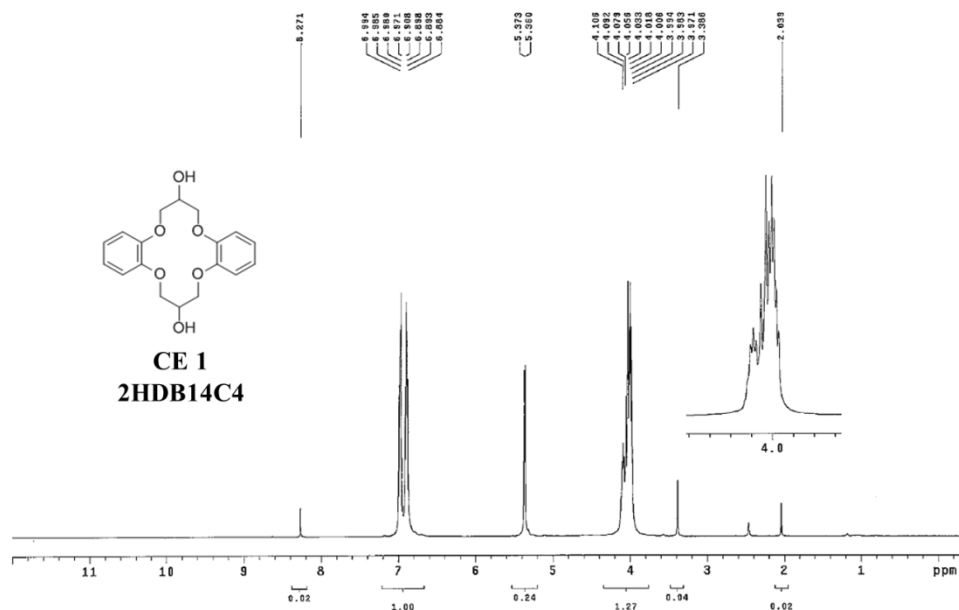

<sup>1</sup>H NMR (DMSO-D<sub>6</sub>, 400 MHz): (δ, ppm) 1.07 (s, 6 H, 4 -CH<sub>3</sub>), 1.09 (s, 6 H, 4 -CH<sub>3</sub>), 3.39-3.44 (m, 2 H, -O-CH<sub>2</sub>-), 3.64-3.68 (m, 2 H, -O-CH<sub>2</sub>-), 3.76-3.82 (m, 4 H, 2 -CH-, -O-CH<sub>2</sub>-), 3.89-3.94 (m, 2 H, -O-CH<sub>2</sub>-), 4.82 (s, 1H, -OH), 4.83 (s, 1H, -OH), 6.87-6.90 (m, 2H, Ar-H), 6.95-6.98 (m, 2H, Ar-H).

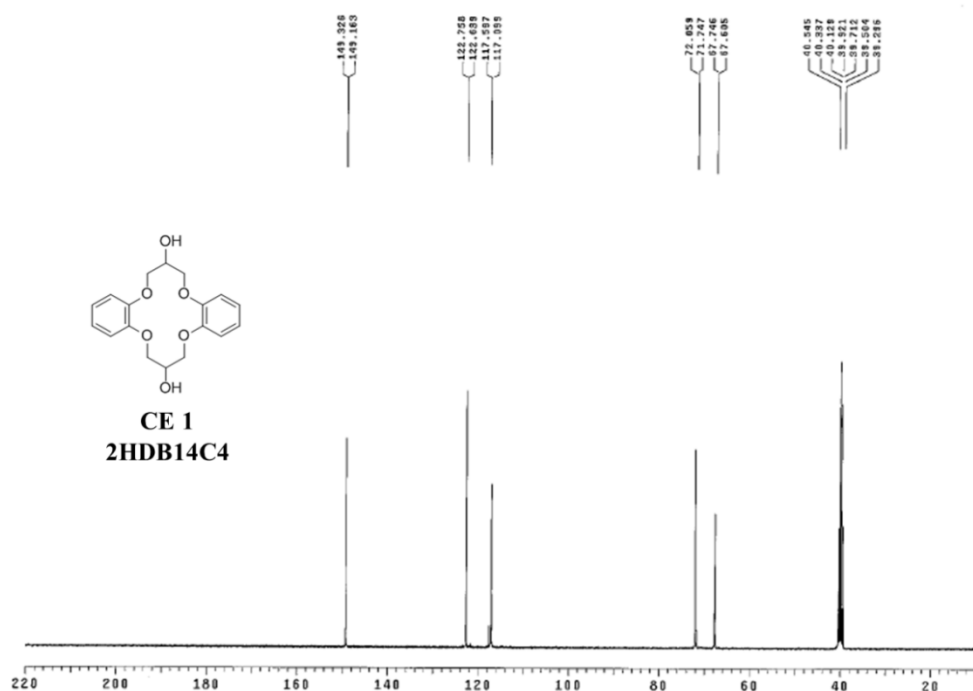

<sup>13</sup>C NMR (DMSO-D<sub>6</sub>, 100 MHz): (δ, ppm) 67.61, 67.75, 71.75, 72.06, 117.10, 117.51, 122.64, 122.76, 149.16, 149.33

**Figure S3.** <sup>1</sup>H and <sup>13</sup>C NMR spectra of CE 1: 6,7,8,15,16,17-hexahydrodibenzo[1,4,8,11]tetraoxacyclotetradecine-7,16-diol denoted as **2HDB14C4**.

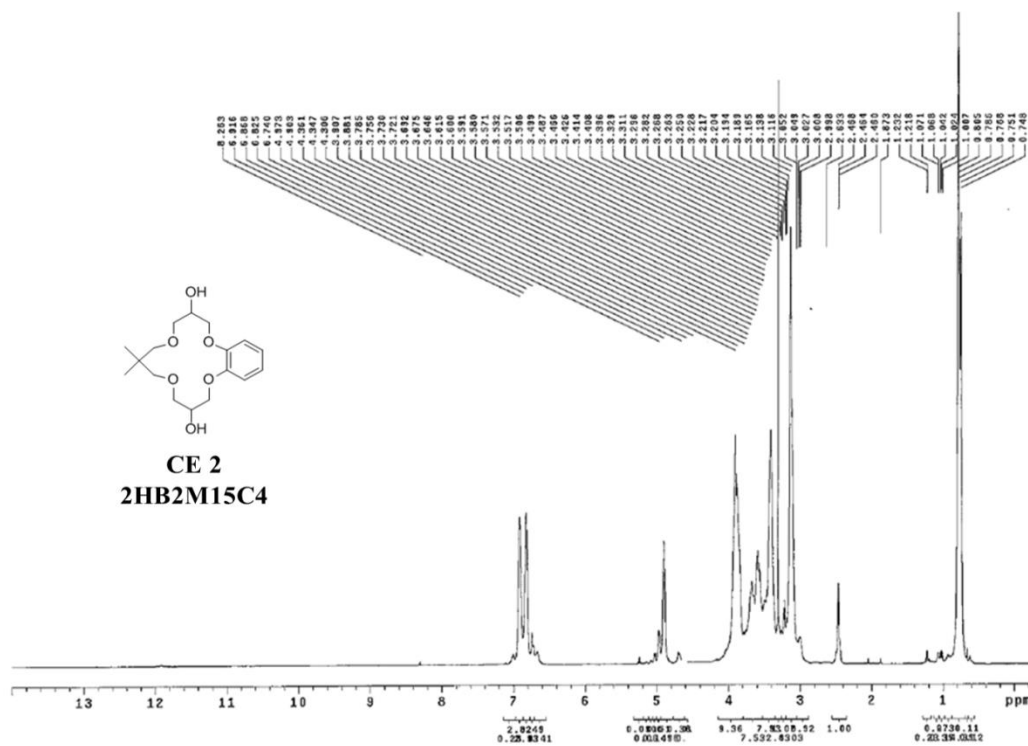

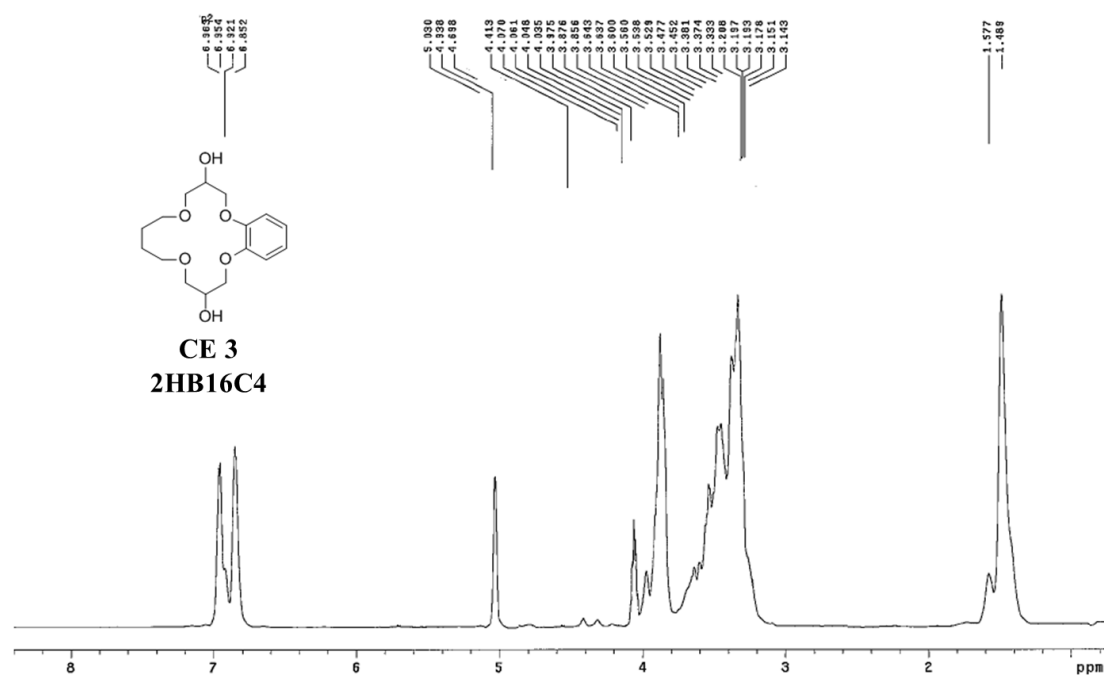

$^1\text{H}$  NMR (400 MHz,  $\text{CDCl}_3$ )  $\delta$  (ppm): 1.49 (s, 4 H); 3.14-3.64 (m, 10H), 3.85-4.36 (m, 4H), 4.94 (b, 2H), 6.85-6.96 (m, 4H).

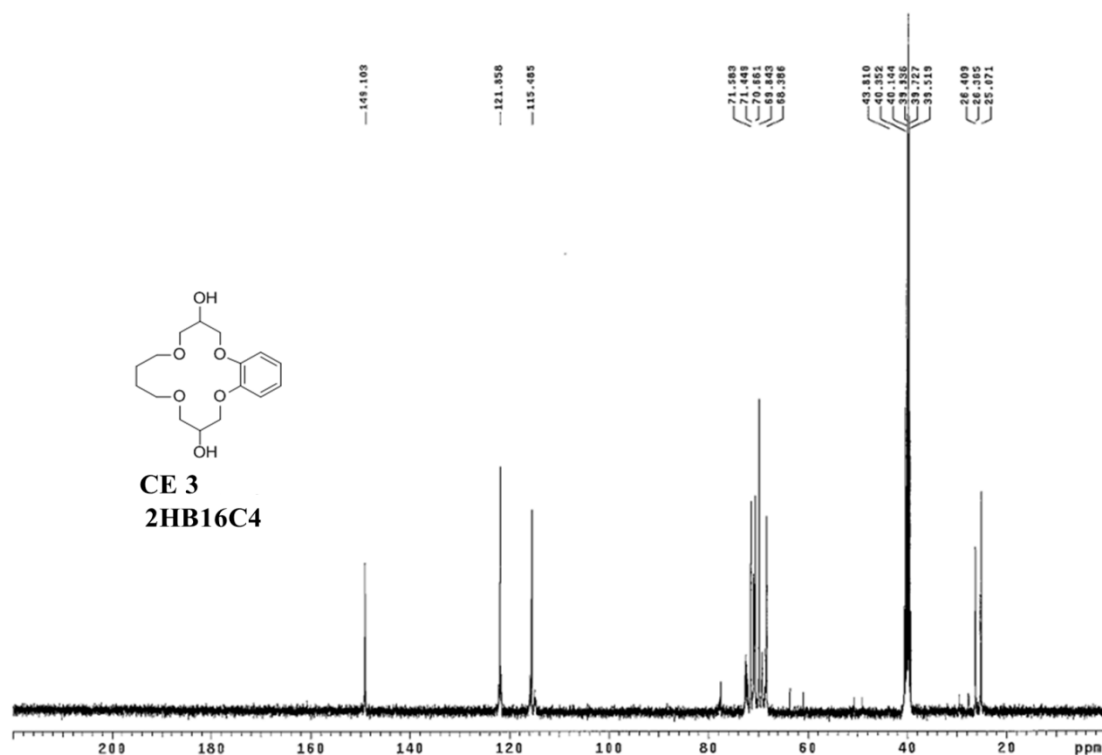

$^{13}\text{C}$  NMR (100 MHz,  $\text{CDCl}_3$ ):  $\delta$  (ppm) 25.07, 68.39, 69.84, 70.66, 71.45, 71.58, 115.49, 121.86, 149.10.

**Figure S5.**  $^1\text{H}$  and  $^{13}\text{C}$  NMR spectra of CE 3: 2,3,4,6,7,8,9,11,12,13-decahydrobenzo[1,4,8,13] tetraoxacyclohexadecine-3,12-diol denoted as **2HB16C4**.

## Electrospinning conditions

**Table S1.** Electrospinning conditions for the fabrication of MF adsorbents.

| Parameters                                | Values                                         |
|-------------------------------------------|------------------------------------------------|
| <b>Dope solution</b>                      |                                                |
| Polymer                                   | PVA                                            |
| Polymer concentration                     | 9 wt%                                          |
| Solvent                                   | Water                                          |
| Organic adsorbents                        | 2HDB14C4, 2HB2M15C4,<br>2HB16C4                |
| CE loading in PVA                         | 50 wt%                                         |
| <b>Electrospinning conditions</b>         |                                                |
| Dope solution volume (mL)                 | 12                                             |
| Syringe with a needle                     | $\varnothing_{\text{inner}} = 0.51 \text{ mm}$ |
| Syringe pump speed (mL hr <sup>-1</sup> ) | 2                                              |
| Voltage (kV)                              | 24-26                                          |
| Needle inner diameter (mm)                | 0.51                                           |
| Needle tip-collector distance (mm)        | 120                                            |
| Collector                                 | Drum roll type                                 |
| Collector rotation speed (RPM)            | 500                                            |
| Nanofiber drying temperature (°C)         | 50                                             |
| Nanofiber drying time (h)                 | 5                                              |

### Synthesis of Methylated CEs (mCEs) for control MF samples

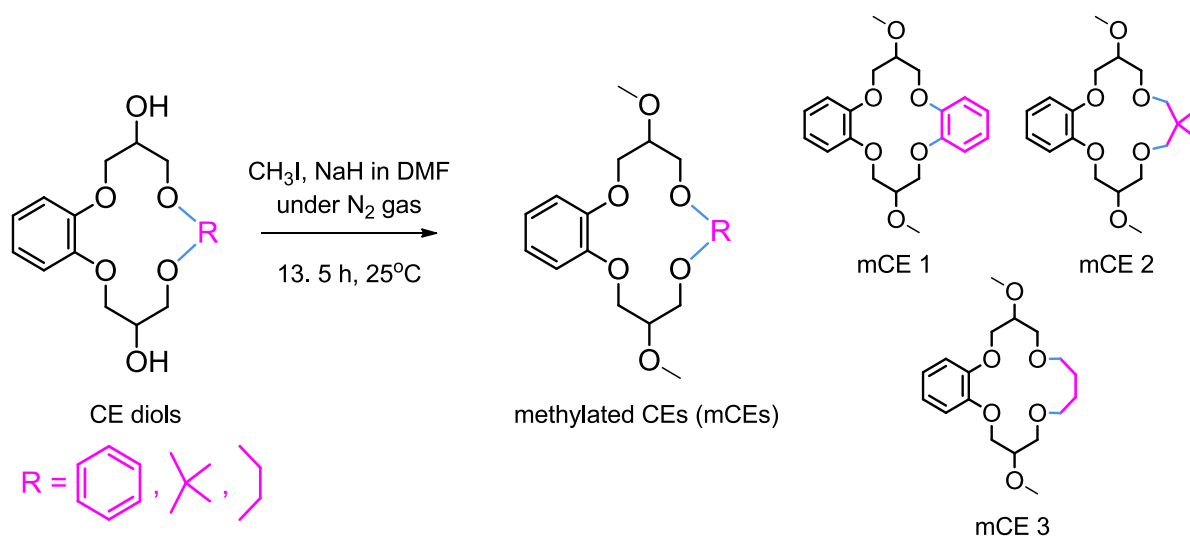

**Figure S6.** Synthesis scheme of methylated CEs via etherification.

Methylated CEs (mCE) were synthesized by etherification of CE diols with iodomethane ( $\text{CH}_3\text{I}$ ). Each CE diol (4g, 12 mmol) was dissolved in 10 mL anhydrous DMF. The solution was added slowly in 100 mL three neck RBF containing NaH (3 eq., 36 mmol) dispersed in 20 mL anhydrous DMF under  $\text{N}_2$  gas. The reaction was stirred for 1 h before slowly adding  $\text{CH}_3\text{I}$  (8 eq., 96 mmol), which was dissolved in 10 mL anhydrous DMF, within 30 min. The reaction was continuously stirred at room temperature for another 12 h before quenching with water and DCM (200 mL). The reaction product was washed repeatedly with water (~2 L) to remove DMF. The organic phase was dried over  $\text{MgSO}_4$  and reduced under vacuum. The crude oil was purified by silica gel chromatography using  $\text{CHCl}_3$  as eluent to afford the corresponding mCEs in excellent yields (mCE 1, 4.1 g, **92% yield**; mCE 2, 3.9 g, **90% yield**; mCE 3, 3.5 g, **85% yield**).

### Characterization results of mCE compounds

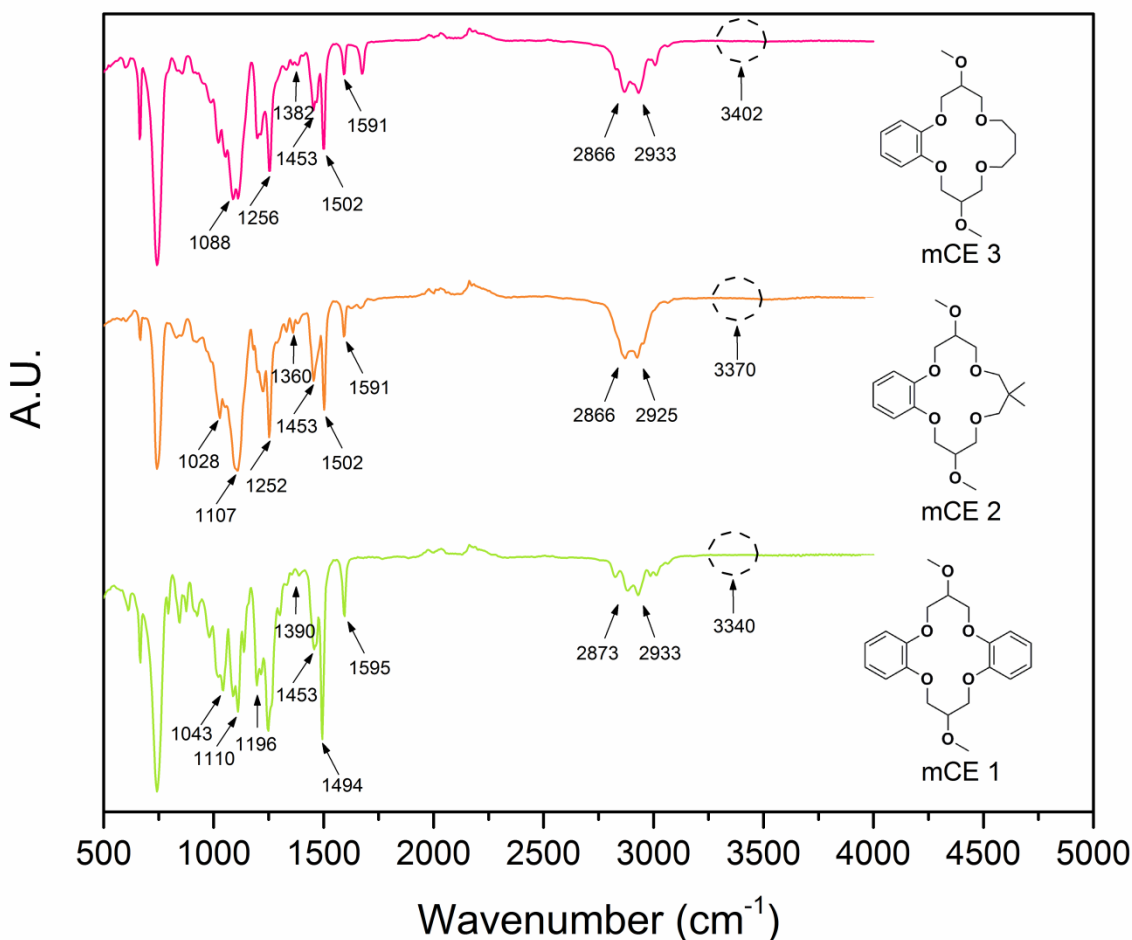

**Figure S7.** FTIR spectra of methylated CEs (mCE 1 – 3).

Similar to the CE diols (Figure 3b), methylated CEs (mCEs) exhibited characteristic FTIR peaks from the C-H stretching ( $2933\text{--}2866\text{ cm}^{-1}$ )<sup>4,5</sup> and C-H bending ( $1390\text{--}1360\text{ cm}^{-1}$ ) of the etherified  $\text{CH}_3$  groups and CE rings, from the C=C stretching of benzene ( $1594\text{--}1452\text{ cm}^{-1}$ )<sup>6</sup> and from the C-O-C ether stretching of the rings ( $1257\text{--}1032\text{ cm}^{-1}$ ).<sup>7</sup> FTIR also reflected the main difference between the CE diols and mCEs. The absence of vibrational O-H peaks ( $3402\text{--}3340\text{ cm}^{-1}$ ) in mCE samples strongly indicates successful etherification of CE diols with  $\text{CH}_3$ .

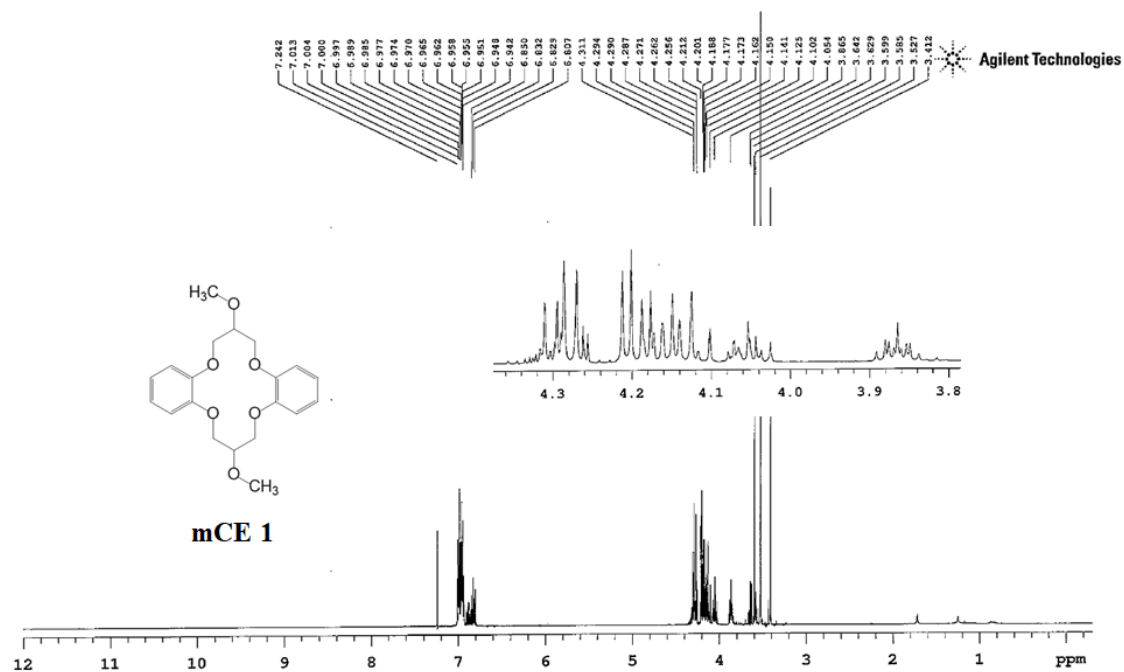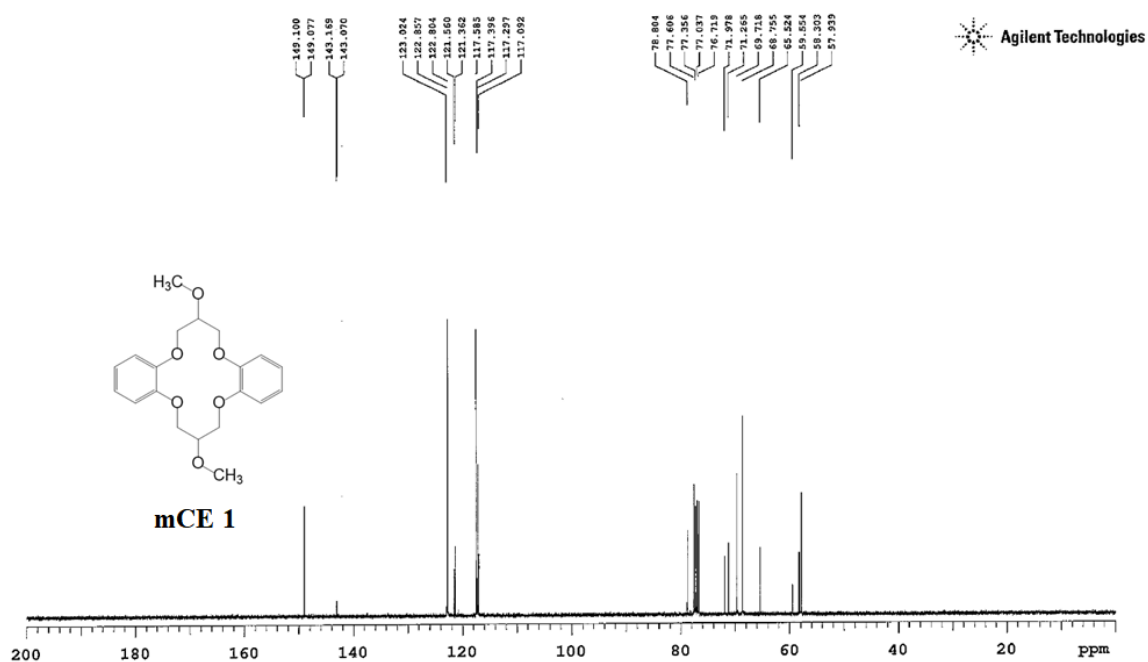

**Figure S8.** <sup>1</sup>H and <sup>13</sup>C NMR spectra of **mCE 1**: 7,16-dimethoxy-6,7,8,15,16,17-hexahydrodibenzo[b,i][1,4,8,11]tetraoxacyclotetradecine.

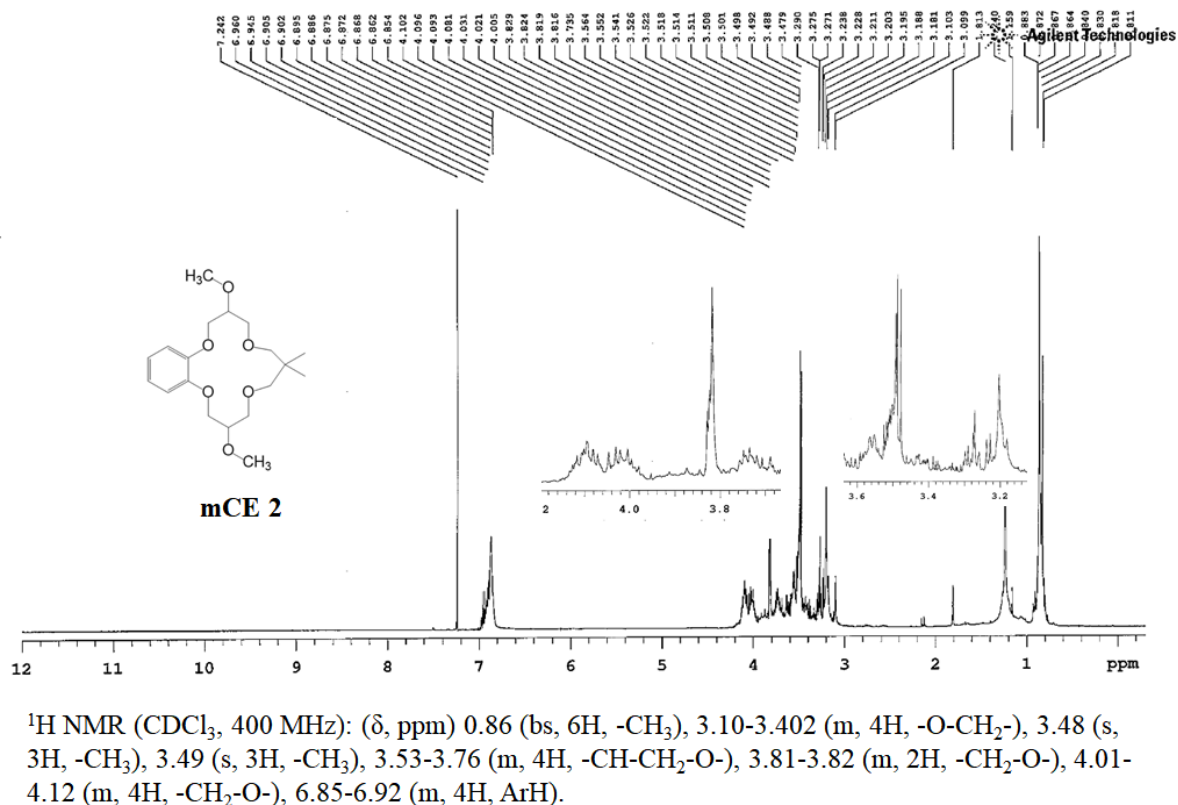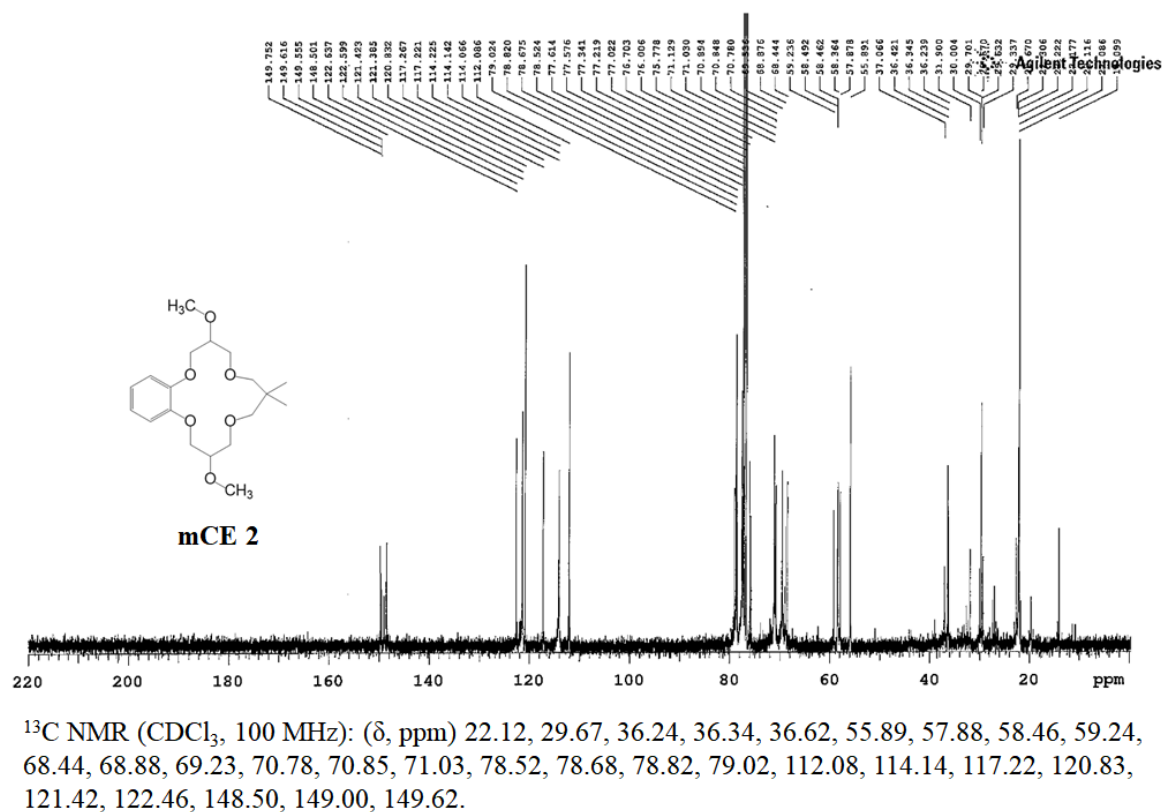

**Figure S9.**  $^1\text{H}$  and  $^{13}\text{C}$  NMR spectra of **mCE 2**: 3,11-dimethoxy-7,7-dimethyl-3,4,6,7,8,10,11,12-octahydro-2H-benzo[b][1,4,8,12]tetraoxacyclopentadecine.



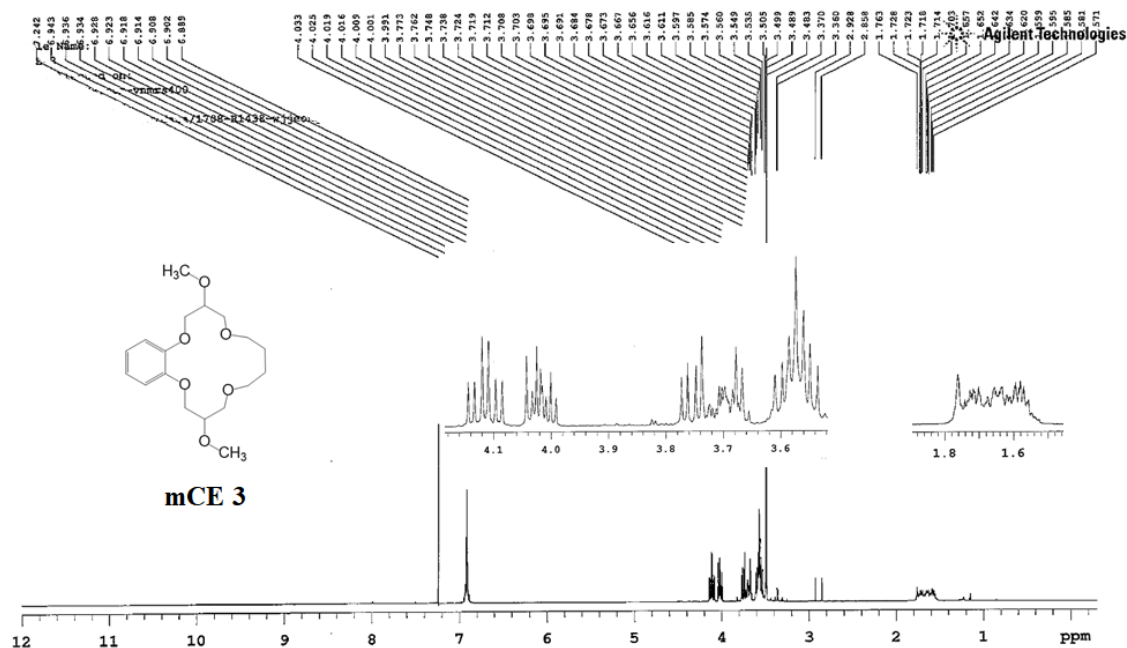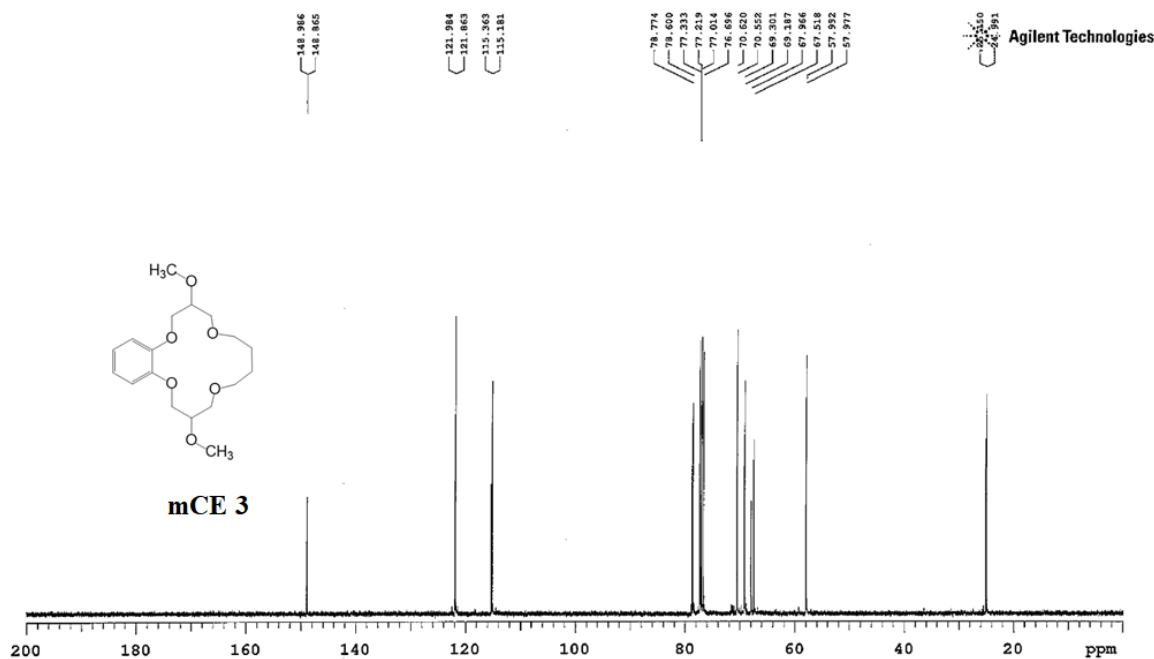

**Figure S10.** <sup>1</sup>H and <sup>13</sup>C NMR spectra of **mCE 3**: 3,12-dimethoxy-2,3,4,6,7,8,9,11,12,13-decahydrobenzo[b][1,4,8,13]tetraoxacyclohexadecine.

### Calculations for MF stability tests

Table S2 (p. S19) summarizes the equations used for the stability tests performed on crosslinked CE/PVA and control mCE/PVA MFs. In Table S2,  $w_1$  = weight of a pristine electrospun MF sample; weight fractions of CE ( $f_{CE}$ ) and PVA ( $f_{PVA}$ ) are based on 50 wt% CE loading with respect to PVA amount. For example, 1 g of PVA in dope is added with 0.5 g of CE diol thus  $f_{PVA} \cong 1 \text{ g}/1.5 \text{ g} \cong 0.667$  whereas  $f_{CE} \cong 1 - 0.667 = 0.333$ . Thus, for any sample with  $w_1$ , the mass of CE is  $m_{CE} = f_{CE} \times w_1$  and PVA is  $m_{PVA} = (1 - f_{CE}) \times w_1$ . After aerosol crosslinking, weight of the unwashed aerosol crosslinked MF ( $w_2$ ) was determined. Before the test, the  $m_{PVA}$  and  $m_{CE}$  would still be the same as in  $w_1$ . Thus, the weight gain ( $w_2 - w_1$ ) could be the GA component which crosslinked the MF ( $m_{GA}$ ).

After careful drying of the samples from the elution test (section 2.5 main article), the MFs are re-weighed as  $w_3$ . Thus, total % MF mass loss =  $(w_3 - w_2)/w_2 \times 100$ . The CEs eluted from the fibers ( $m_{CE\_loss}$ ) were determined by quantifying the CE concentration  $[CE]_{UV-Vis}$  in the ( $V = 50 \text{ mL}$ ) eluent, using UV-VIS spectrophotometry (section 2.8, main article). Dividing  $m_{CE\_loss}$  with  $m_{CE}$  estimates the % CE loss in the MF sample. The eluents were also analyzed for total organic carbon (TOC) concentration (section 2.8 main article) which is the total carbons for PVA + CE components,  $[C]_{TOC} = [PVA]_C + [CE]_C$ . No GA was eluted from the MF as indicated by the clean UV-Vis spectra of the eluents (Fig. S15); only eluted CEs were detected. The unreacted GAs were efficiently removed when the MFs were vacuum-dried at  $50^\circ\text{C}$  after the crosslinking step.<sup>8</sup> Thus, the mass of PVA lost ( $m_{PVA\_loss}$ ) was determined using  $[C]_{TOC} - [CE]_C$ . Conversions of CE and PVA concentrations as  $\text{C mg L}^{-1}$  ( $[CE]_C$  and  $[PVA]_C$ ) and vice versa were performed using the carbon mass fractions in CE diols ( $f_{C-CE}$ ) and PVA ( $f_{C-PVA}$ ). Dividing  $m_{PVA\_loss}$  with  $m_{PVA}$  estimates the % PVA loss in the MF sample.

### Actual composition of MFs used for adsorption studies

Calculations for the elution tests (Table S2) can also be used to determine the actual mass fractions of components in washed MF samples. After pre-washing, the washing solutions of MFs were analyzed for eluted CE and PVA as described above. After drying the MF samples, prior to adsorption experiments, the final weight  $m_{MF}$  is in fact equivalent to  $w_3$  ( $m_{MF} = w_3$ ) as described in Table S2. So actual mass of CE in the washed MF is equal to  $m'_{CE} = m_{CE} - m_{CE\_loss}$  whereas actual PVA in the washed MF is equal to  $m'_{PVA} = m_{PVA} - m_{PVA\_loss}$ . Meanwhile,  $m_{GA} = w_3 - m'_{CE} - m'_{PVA}$  which is almost the same as  $w_2 - w_1$  (Table S2). Thus, actual mass fractions of each component  $f'_{CE} = m'_{CE}/m_{MF}$ ,  $f'_{PVA} = m'_{PVA}/m_{MF}$ , and  $f'_{GA} = m_{GA}/m_{MF}$  can be known (see Table S2) for washed MFs used for adsorption studies.

Using this experimentally determined mass fractions ( $f'_{CE}$ ,  $f'_{PVA}$ ,  $f'_{GA}$ ), the adsorption contribution of each component can be known according to the modified adsorption model.<sup>9</sup>

$$q_e = q_{CE} \cdot f'_{CE} + q_{GA/PVA} \cdot (1 - f'_{CE})$$

To determine the adsorption capacity of the CE component ( $q_{CE}$ ) from the experimental adsorption results, the equation above can be re-arranged as shown below:

$$q_{CE} = \frac{q_e - [q_{GA/PVA} \cdot (1 - f'_{CE})]}{f'_{CE}}$$

**Table S2.** List of equations used for the stability tests and actual MF composition determination.

| Fresh electrospun MFs                                                            | Aerosol GA crosslinked MFs        | MFs after stability test                                                                                                         |
|----------------------------------------------------------------------------------|-----------------------------------|----------------------------------------------------------------------------------------------------------------------------------|
| $w_1 = m_{CE} + m_{PVA}$                                                         | $w_2 = m_{CE} + m_{PVA} + m_{GA}$ | $w_3 = (m_{CE} - m_{CE\_loss}) + (m_{PVA} - m_{PVA\_loss}) + m_{GA}$<br>$= m'_{CE} + m'_{PVA} + m_{GA}$                          |
| <b>For 50 wt% CE loading in dope:</b>                                            |                                   | $\% MF\ mass\ loss = \frac{w_2 - w_3}{w_2} \times 100$                                                                           |
| <b>If <math>w_{CE} \cong 0.5</math> g, then <math>w_{PVA} \cong 1.0</math> g</b> |                                   | $m_{CE\_loss} = [CE]_{UV-Vis} \times V_{eluent}$                                                                                 |
| $f_{CE} = \frac{w_{CE}}{w_{CE} + w_{PVA}} \cong 0.333$                           |                                   | $\% CE\ loss = \frac{[CE]_{UV-Vis} \times V_{eluent}}{m_{CE}} \times 100$                                                        |
| $f_{PVA} = (1 - \frac{w_{CE}}{w_{CE} + w_{PVA}}) \cong 0.667$                    |                                   | $m_{PVA\_loss} = \frac{([C]_{TOC} - [CE]_C) \times V_{eluent}}{f_{C-PVA}} = [PVA] \times V_{eluent}$                             |
|                                                                                  |                                   | $\% PVA\ loss = \frac{[PVA] \times V_{eluent}}{m_{PVA}} \times 100$                                                              |
|                                                                                  |                                   | Conversions:<br>$[C]_{TOC} = [PVA]_c + [CE]_c$<br>$[PVA]_c = [PVA] \times f_{C-PVA}$<br>$[CE]_c = [CE]_{UV-Vis} \times f_{C-CE}$ |
| <b>Component masses in uncrosslinked MF sample:</b>                              |                                   | Final component masses of washed MF samples:                                                                                     |
| $m_{CE} = f_{CE} \times w_1$                                                     |                                   | $m_{GA} = w_3 - m'_{CE} - m'_{PVA} \cong w_3 - w_2$                                                                              |
| $m_{PVA} = f_{PVA} \times w_1$                                                   |                                   | $f'_{GA} = \frac{m_{GA}}{w_3}; f'_{PVA} = \frac{m'_{PVA}}{w_3}; f'_{CE} = \frac{m'_{CE}}{w_3}$                                   |

### Calibration curves for PVA and CE concentrations in elution tests

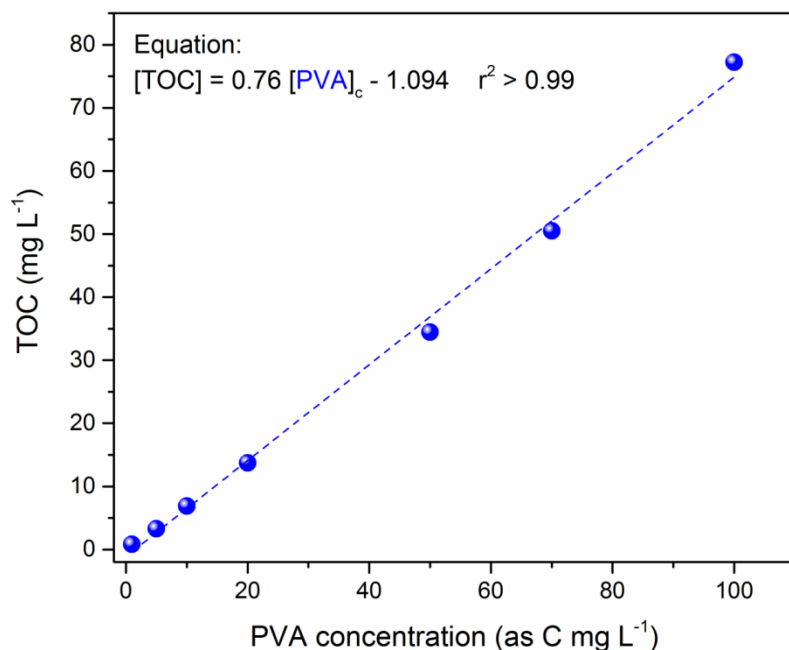

**Figure S11.** Calibration curve for PVA [as C] via TOC analysis.

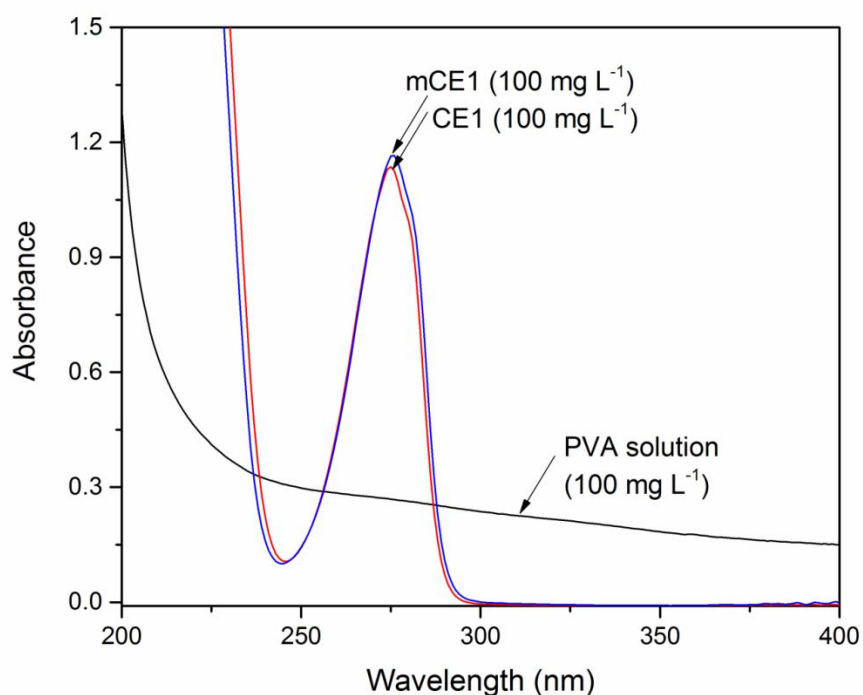

**Figure S12.** UV-Vis spectra of mCEs and CE diols with no interference from PVA. This method was used to selectively quantify the CEs dissolved in water (pH = 8) during the MF adsorbent stability test.

### Calibration curves for PVA and CE concentrations in elution tests

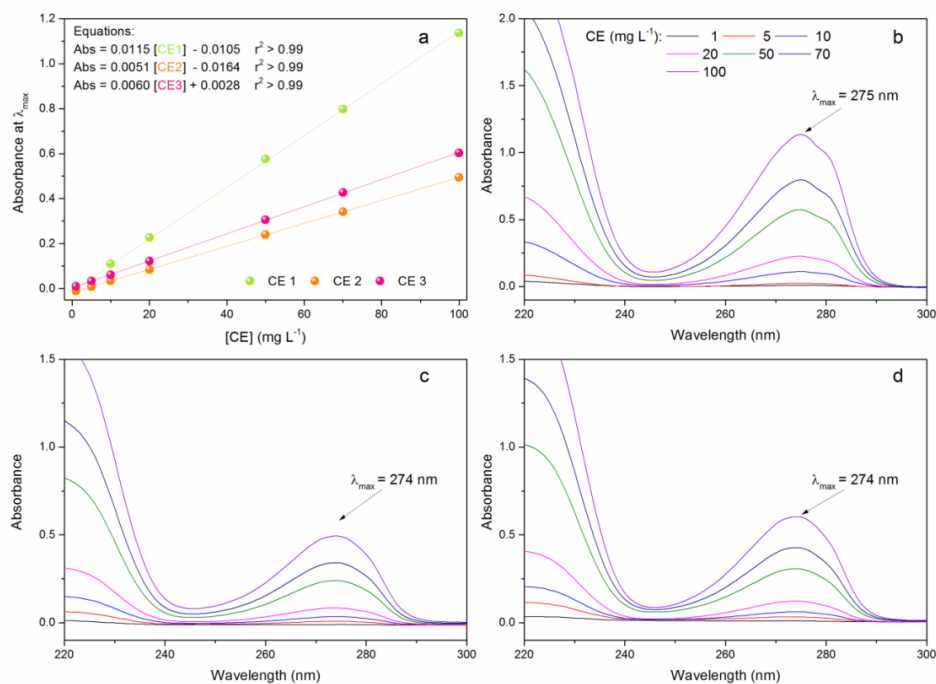

**Figure S13.** Constructed standard curves for (a) CE diols using UV-Vis spectrophotometry (5 – 100 mg L<sup>-1</sup>). The maximum absorbances at  $\lambda_{\text{max}}$  were recorded for (b) CE 1, (c) CE 2, and (d) CE 3.

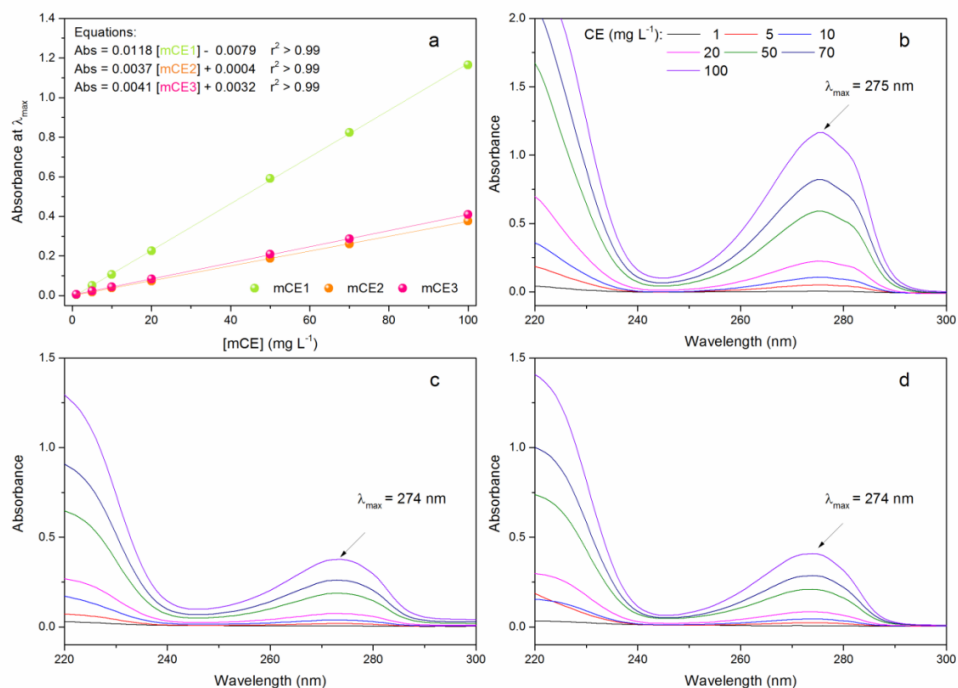

**Figure S14.** Constructed standard curves for (a) methylated CEs (mCEs) using UV-Vis spectrophotometry (5 – 100 mg L<sup>-1</sup>). The maximum absorbances at  $\lambda_{\text{max}}$  were recorded for (b) mCE 1, (c) mCE 2, and (d) mCE 3.

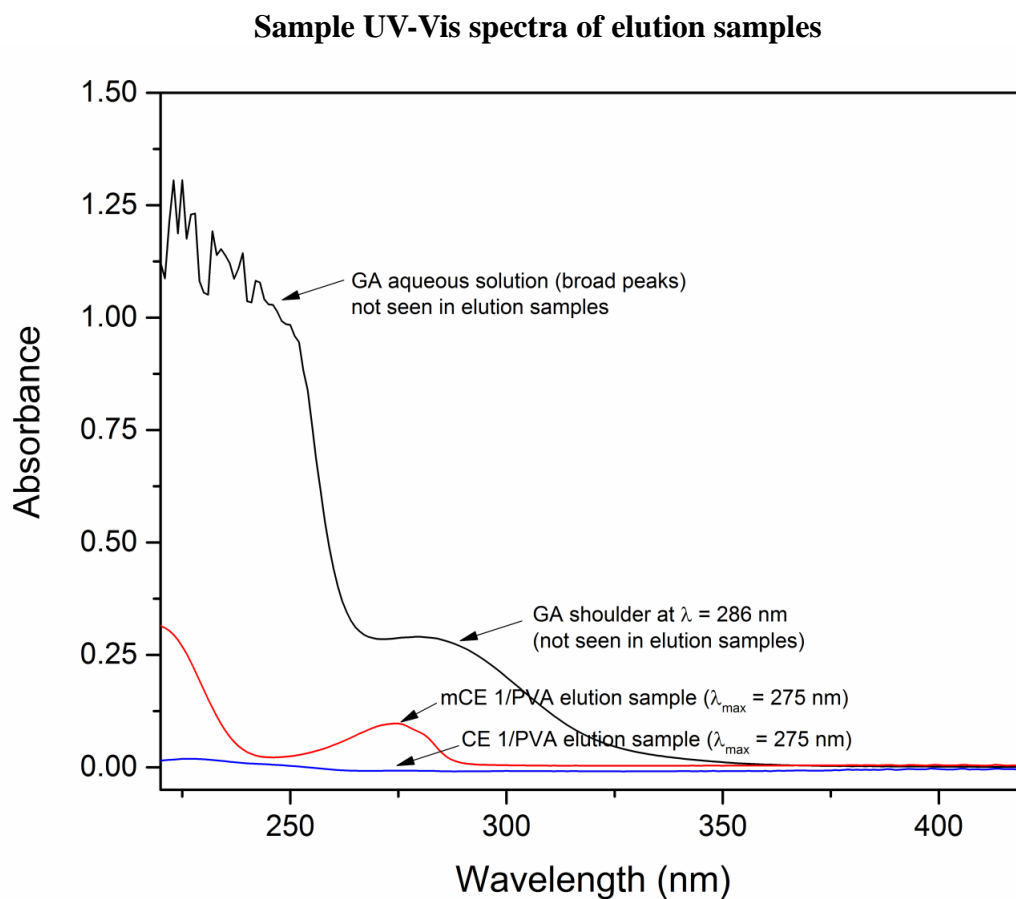

**Figure S15.** Sample UV-Vis spectra of eluent samples from CE/PVA and mCE/PVA MFs. A spectrum for GA aqueous solution is overlaid.

Elution samples of CE/PVA and mCE/PVA did not contain characteristic peaks of GA, suggesting that no residual GA was eluted from the MFs. Residual GA is typically removed (evaporation) during MF crosslinking and vacuum-drying at 50°C.<sup>8</sup>

**Table S3.** Integrated FTIR peaks and corresponding ratios.

| <b>CE 1</b>     | <b>Area</b> | <b>Height</b> | <b>Centroid</b> | <b>CE 1/GA</b>  | <b>Area</b> | <b>Height</b> | <b>Centroid</b> | <b>I<sub>p</sub></b> |
|-----------------|-------------|---------------|-----------------|-----------------|-------------|---------------|-----------------|----------------------|
| C-H doublet     | 1184.63     | 10.41         | 2874.88         | C-H doublet     | 1852.33     | 15.65         | 2889.14         | 1.56                 |
| O-H             | 4031.29     | 14.31         | 3382.11         | O-H             | 3903.55     | 11.98         | 3382.17         | 0.97                 |
| C=O GA residual | -           | -             | -               | C=O GA residual | 910.26      | 20.36         | 1700.59         | -                    |
| <b>CE 2</b>     |             |               |                 | <b>CE 2/GA</b>  |             |               |                 |                      |
| C-H doublet     | 2796.58     | 22.94         | 2888.90         | C-H doublet     | 3011.47     | 24.20         | 2887.15         | 1.08                 |
| O-H             | 3908.29     | 12.42         | 3388.60         | O-H             | 1937.85     | 7.27          | 3409.91         | 0.50                 |
| C=O GA residual | -           | -             | -               | C=O GA residual | 319.77      | 5.18          | 1711.13         | -                    |
| <b>CE 3</b>     |             |               |                 | <b>CE 3/GA</b>  |             |               |                 |                      |
| C-H doublet     | 3487.85     | 29.29         | 2882.96         | C-H doublet     | 3774.61     | 29.38         | 2879.96         | 1.08                 |
| O-H             | 4862.61     | 13.25         | 3386.38         | O-H             | 2286.84     | 8.42          | 3413.34         | 0.47                 |
| C=O GA residual | -           | -             | -               | C=O GA residual | 95.49       | 4.38          | 1722.53         | -                    |

Prior integration, baseline correction (2<sup>nd</sup> derivative) was performed in all FTIR spectra. After GA crosslinking, all samples had reduced OH groups ( $I_p < 1$ ) and increased C-H stretching ( $I_p > 1$ ). These results are indicative of GA crosslinking which involves OH consumption from the diols and incorporation of GA alkyl chains in CE/GA samples.<sup>5,8</sup> Moreover, broadened peaks at 1034 cm<sup>-1</sup> (CE 1/GA), 1103 cm<sup>-1</sup> (CE 2/GA) and 1106 cm<sup>-1</sup> (CE 3/GA) are strong indications of acetal group formation.<sup>4,5,10</sup> These results confirm the reactivity of CE diols with GA, which is critical for the creation of CE-GA-PVA linkages. If the diols are to be ranked according to their GA reactivity, CE 2 and CE 3 are more reactive than CE 1 as both had higher OH groups consumed at similar extents ( $I_p \sim 0.47 - 0.50$ ). But CE 3 was the most reactive given its lowest content of unreacted GA (C=O peak area of 95.49). This suggests that the differences in CE structures must have affected their GA reactivities. Overall results demonstrate that CE 3, which has the least bulky sub-unit, is the most GA reactive. On the other hand, CE 1 which might have encountered steric hindrances from its benzo groups,<sup>11</sup> is the least amenable to GA crosslinking.

### Elution test results and actual compositions of MFs used for adsorption experiments

**Table S4.** Swelling ratio and measurements for the stability test of pure PVA, CE/PVA and mCE/PVA MFs.

| Type      | Swelling Ratio ( <i>S</i> ) | $w_1$ (mg)   | $m_{CE}$ (mg) | $m_{PVA}$ (mg) | $w_2$ (mg)   | $[CE]_{UV-vis}$ (mg L <sup>-1</sup> ) | $[C]$ mg L <sup>-1</sup> | $[PVA]$ (mg L <sup>-1</sup> ) |
|-----------|-----------------------------|--------------|---------------|----------------|--------------|---------------------------------------|--------------------------|-------------------------------|
| CE 1/PVA  | 0.127 ± 0.007               | 25.05 ± 3.46 | 8.36 ± 1.16   | 16.69 ± 2.31   | 27.00 ± 3.96 | 0.36 ± 0.17                           | 3.33 ± 0.33              | 5.67 ± 0.79                   |
| CE 2/PVA  | 0.134 ± 0.011               | 23.15 ± 0.64 | 7.77 ± 0.21   | 15.38 ± 0.42   | 25.30 ± 1.84 | 0.85 ± 0.11                           | 4.09 ± 0.17              | 6.52 ± 0.44                   |
| CE 3/PVA  | 0.132 ± 0.001               | 26.80 ± 3.25 | 9.11 ± 1.11   | 17.69 ± 2.15   | 29.25 ± 3.04 | 0.22 ± 0.07                           | 3.33 ± 0.59              | 6.10 ± 0.59                   |
| mCE 1/PVA | 0.413 ± 0.185               | -            | 9.52 ± 0.61   | 19.94 ± 1.23   | 28.60 ± 1.84 | 23.35 ± 0.13                          | 70.89 ± 0.19             | 29.67 ± 0.15                  |
| mCE 2/PVA | 0.229 ± 0.154               | -            | 8.54 ± 0.54   | 17.11 ± 1.08   | 25.70 ± 1.63 | 59.22 ± 0.38                          | 104.97 ± 0.47            | 37.07 ± 0.13                  |
| mCE 3/PVA | 0.231 ± 0.121               | -            | 9.71 ± 0.31   | 19.44 ± 0.61   | 29.20 ± 0.92 | 183.96 ± 9.29                         | 229.99 ± 9.58            | 63.77 ± 2.11                  |
| Pure PVA  | 0.321 ± 0.036               | 27.75 ± 2.05 | 0             | 27.75 ± 2.05   | 29.80 ± 1.56 | 0                                     | 3.00 ± 0.32              | 5.50 ± 0.59                   |

**Table S5.** Component losses (CE and PVA) during elution tests and the final composition of MF samples used for adsorption experiments.

| Type      | $m_{loss-CE}$ (mg) | $m_{loss-PVA}$ (mg) | % CE loss    | % PVA loss   | $m_{MF}$ (mg) | $m_{GA}$ (mg) | $f'_{CE}$     | $f'_{PVA}$    | $f'_{GA}$     |
|-----------|--------------------|---------------------|--------------|--------------|---------------|---------------|---------------|---------------|---------------|
| CE 1/PVA  | 0.018 ± 0.008      | 0.28 ± 0.04         | 0.23 ± 0.13  | 1.70 ± 0.00  | 26.7 ± 4.0    | 1.95 ± 0.49   | 0.313 ± 0.003 | 0.615 ± 0.006 | 0.072 ± 0.008 |
| CE 2/PVA  | 0.042 ± 0.005      | 0.33 ± 0.02         | 0.54 ± 0.05  | 2.12 ± 0.20  | 24.9 ± 1.8    | 2.15 ± 1.20   | 0.311 ± 0.015 | 0.606 ± 0.027 | 0.085 ± 0.042 |
| CE 3/PVA  | 0.011 ± 0.004      | 0.31 ± 0.03         | 0.12 ± 0.03  | 1.73 ± 0.04  | 29.0 ± 3.0    | 2.45 ± 0.21   | 0.313 ± 0.006 | 0.599 ± 0.012 | 0.085 ± 0.016 |
| mCE 1/PVA | 1.272 ± 0.007      | 4.99 ± 0.03         | 13.34 ± 0.79 | 26.20 ± 1.82 | -             | -             | -             | -             | -             |
| mCE 2/PVA | 2.961 ± 0.019      | 6.23 ± 0.02         | 34.73 ± 1.98 | 36.48 ± 2.19 | -             | -             | -             | -             | -             |
| mCE 3/PVA | 9.198 ± 0.465      | 10.72 ± 0.35        | 94.73 ± 1.80 | 55.12 ± 0.08 | -             | -             | -             | -             | -             |
| Pure PVA  | 0                  | 0.28 ± 0.03         | 0            | 0.99 ± 0.03  | 29.5 ± 1.5    | 2.05 ± 0.49   | 0             | 0.929 ± 0.022 | 0.070 ± 0.020 |



### **<sup>13</sup>C CP/MAS NMR results and peak interpretation**

Due to the broad peaks of <sup>13</sup>C CP-MAS NMR spectra (Figure S16-S19), the results were partially resolved and predicted using MestRenova 11.0.2.<sup>12</sup> The identified peaks and assignments were listed in Tables S6-S9. In GA crosslinked pure PVA MF (Figure S16, Table S6), the acetal (1)<sup>13</sup> and hemi-acetal carbons (2)<sup>14</sup> formed during GA crosslinking were detected. Likewise,  $\alpha,\beta$ -carbons of the PVA chain were evident, which contained either the crosslinked (3,6) or unreacted OH groups (4,5). Same as the peaks assigned for the  $\alpha,\beta$ -carbons of crosslinked GA (6,7), which are located in the most upfield region of the spectrum.

In CE/PVA samples (Figures S17-S19), similar peaks assigned to the unreacted  $\alpha,\beta$ -carbons in the PVA chains (8-12) and  $\alpha,\beta$ -carbons of crosslinked GA (12-15) were also detected. It also affirms the presence of residual GA (a) in CE 1/PVA as initially revealed by the FTIR results (Figure 3c in article). But unlike the FTIR, characteristic peaks of the CE components were visible in the <sup>13</sup>C CP-MAS NMR. Particularly, the benzyl carbons (1-3) were identified with those bearing ethereal oxygens as the most deshielded (1).<sup>15</sup> The benzyl carbon signals are most remarkable in CE 1/PVA, due to the dibenzo-functionalized CE 1 (Figure S17, Table S7). On the other hand, peaks assigned to the carbon R sub-units in CE 2 and CE 3 were also identified like the tertiary (12) and alkyl carbons (*b*,13) in CE 2/PVA (Figure S18, Table S8), and the butyl carbons (8,14) in CE 3/PVA (Figure S19, Table S9).

The most indicative signals for the CE/GA linkages are those near 70 ppm. By contrast, CE/PVA samples have three resolved peaks (7-9) which were slightly shifted downfield relative to those two (3-4) in pure PVA. Unreacted  $\alpha$ -carbons (C-OH) in PVA and CEs were easily identified (9). As an attempt to decouple the  $\alpha,\beta$ -carbon resonances in crosslinked PVA and CEs, the possible linkages were identified using MestRenova® predictor as detailed in SI p. S30.

Analysis of partially resolved peaks reveals that several types of crosslinks might have been formed. As seen in the spectra, Type I involves acetal carbon (5) formation from GA/PVA linkage whereas Type II identifies acetal carbon (4) formation from GA reacted with one OH-CE and one OH-PVA. Meanwhile, another possible form of linkage (III) involves only one OH of CE in GA crosslinking with its other OH group left unreacted. However, current results cannot confirm nor rule out this type of linkage. Hemi-acetal carbons (6) between CE/GA and PVA/GA linkages were also detected (IV).<sup>14</sup>

### <sup>13</sup>C CP/MAS NMR results

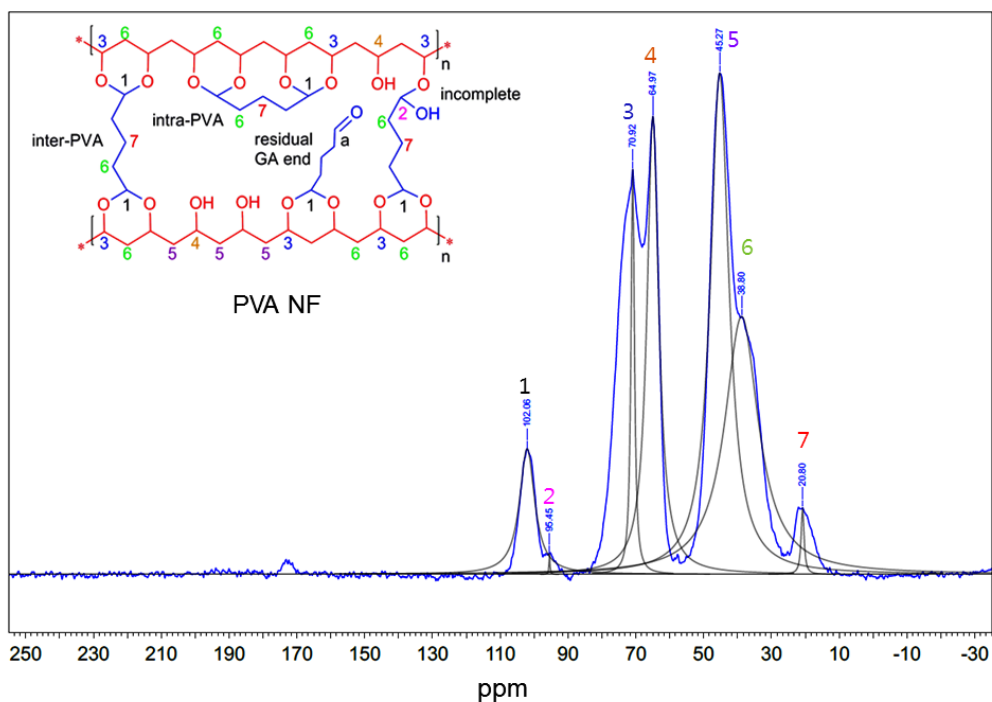

**Figure S16.** <sup>13</sup>C CP/MAS NMR of pure PVA MF.

**Table S6.** Chemical shifts from <sup>13</sup>C CP/MAS NMR and peak assignments for pure PVA MF.

| Crosslink Type | Peak Number | Chemical Shift (δ, ppm) | Assignments                                                 |
|----------------|-------------|-------------------------|-------------------------------------------------------------|
| (I)            | 1           | 102.06                  | acetal carbon GA/PVA                                        |
| (IV)           | 2           | 95.45                   | hemi-acetal carbon                                          |
|                | 3           | 70.92                   | α-carbons of crosslinked PVA                                |
|                | 4           | 64.97                   | α-carbons of PVA with unreacted -OH                         |
|                | 5           | 45.27                   | β-carbons of PVA with unreacted -OH                         |
|                | 6           | 38.80                   | α-carbons of crosslinked GA or β-carbons of crosslinked PVA |
|                | 7           | 20.80                   | β-carbons of crosslinked GA                                 |

### <sup>13</sup>C CP/MAS NMR results

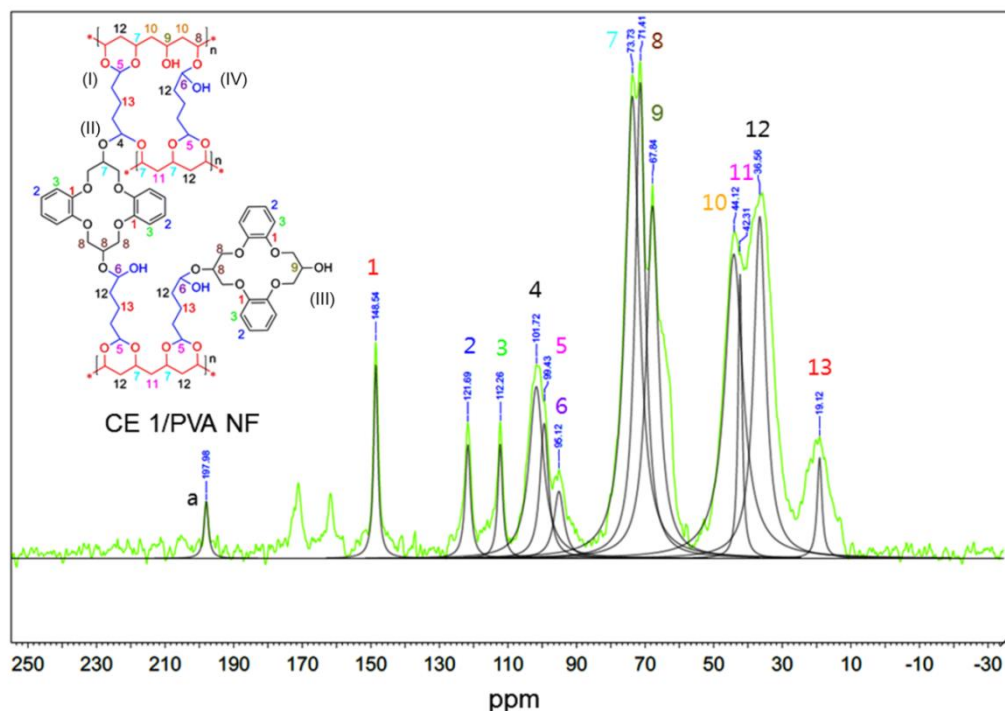

**Figure S17.** <sup>13</sup>C CP/MAS NMR of CE 1/PVA MF.

**Table S7.** Chemical shifts from <sup>13</sup>C CP/MAS NMR and peak assignments for CE 1/PVA MF.

| Crosslink Type | Peak Number | Chemical Shift (δ, ppm) | Assignments                                                                                                                                                            |
|----------------|-------------|-------------------------|------------------------------------------------------------------------------------------------------------------------------------------------------------------------|
|                | 1           | 148.54                  | benzyl carbon bearing O in the CEs                                                                                                                                     |
|                | 2           | 121.69                  | benzyl carbon (C=C)                                                                                                                                                    |
|                | 3           | 112.26                  | benzyl carbon (C=C)                                                                                                                                                    |
| (II)           | 4           | 101.72                  | acetal carbon CE/GA/PVA linkage                                                                                                                                        |
| (I)            | 5           | 99.43                   | acetal carbon GA/PVA linkage                                                                                                                                           |
| (IV)           | 6           | 95.12                   | hemi-acetal carbons between CE/GA or PVA/GA                                                                                                                            |
|                | 7           | 73.73                   | α-carbons CE or PVA with O linked to acetal carbon                                                                                                                     |
|                | 8           | 71.41                   | carbons bearing O in CE with possible overlaps with:<br>α-carbons of PVA with O linked to hemi-acetal carbon,<br>α,β-carbons in CE with O linked to hemi-acetal carbon |
| (III)          | 9           | 67.84                   | α-carbons of PVA or CE with unreacted -OH                                                                                                                              |
|                | 10          | 44.12                   | β-carbons of PVA with unreacted -OH                                                                                                                                    |
|                | 11          | 42.31                   | β-carbons of crosslinked PVA                                                                                                                                           |
|                | 12          | 36.56                   | α-carbons of crosslinked GA or β-carbons of crosslinked PVA                                                                                                            |
|                | 13          | 19.12                   | β-carbons of crosslinked GA                                                                                                                                            |
|                | a           | 197.98                  | end carbon of residual aldehyde group                                                                                                                                  |

# <sup>13</sup>C CP/MAS NMR results

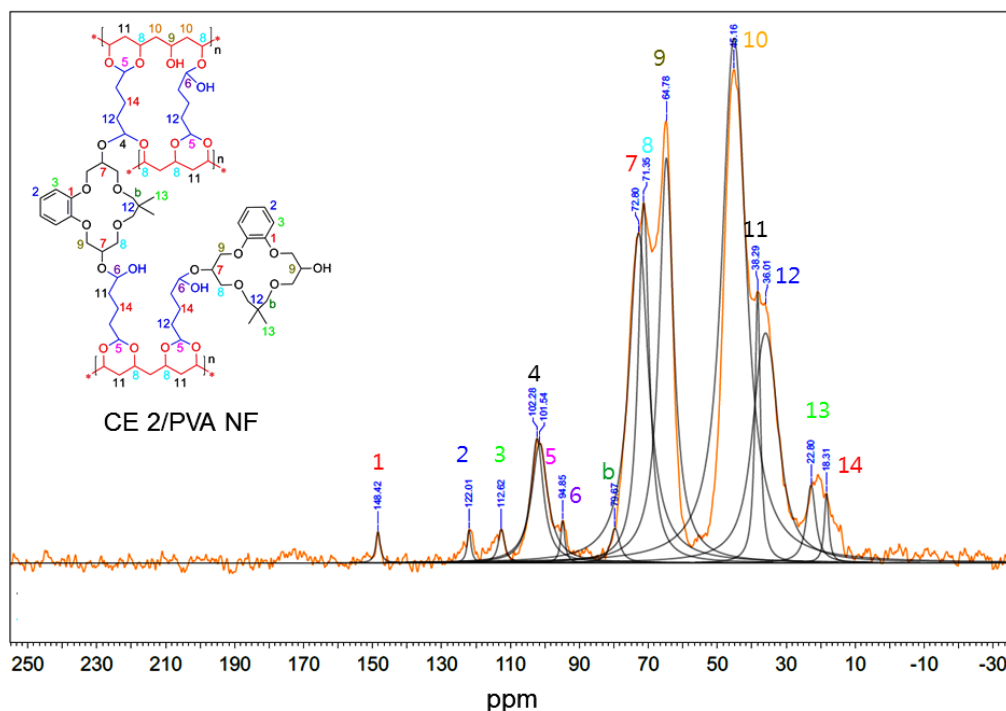

**Figure S18.** <sup>13</sup>C CP/MAS NMR of CE 2/PVA MF.

**Table S8.** Chemical shifts from <sup>13</sup>C CP/MAS NMR and peak assignments for CE 2/PVA MF.

| Crosslink Type | Peak Number | Chemical Shift (δ, ppm) | Assignments                                                                                                                              |
|----------------|-------------|-------------------------|------------------------------------------------------------------------------------------------------------------------------------------|
|                | 1           | 148.42                  | benzyl carbon bearing ethereal O in the CEs                                                                                              |
|                | 2           | 122.01                  | benzyl carbon (C=C)                                                                                                                      |
|                | 3           | 112.62                  | benzyl carbon (C=C)                                                                                                                      |
| (II)           | 4           | 102.28                  | acetal carbon CE/GA/PVA linkage                                                                                                          |
| (I)            | 5           | 101.70                  | acetal carbon GA/PVA linkage                                                                                                             |
| (IV)           | 6           | 94.85                   | hemi-acetal carbons between CE/GA or PVA/GA                                                                                              |
|                | b           | 79.67                   | carbons bearing O at the bulky sub-unit of CE ring                                                                                       |
|                | 7           | 72.80                   | α-carbons of CE with O linked to acetal or hemi-acetal carbon                                                                            |
|                | 8           | 71.35                   | α-carbons of PVA O linked to acetal or hemi-acetal carbon with possible overlap with: carbons bearing O at the bulky sub-unit of CE ring |
| (III)          | 9           | 64.78                   | α-carbons of PVA or CE with unreacted -OH with possible overlap with: carbons bearing O at the benzo-side of CE ring                     |
|                | 10          | 45.16                   | β-carbons of PVA with unreacted -OH                                                                                                      |
|                | 11          | 38.29                   | β-carbons of crosslinked PVA with possible overlap with: α-carbons of crosslinked GA (hemi-acetal carbon)                                |
|                | 12          | 36.01                   | tertiary carbon in the bulky sub-unit of CE ring with possible overlap with: α-carbons of crosslinked GA (acetal carbon)                 |
|                | 13          | 20.82                   | methyl carbons in the bulky sub-unit of CE ring                                                                                          |
|                | 14          | 18.31                   | β-carbons of crosslinked GA                                                                                                              |

## <sup>13</sup>C CP/MAS NMR results

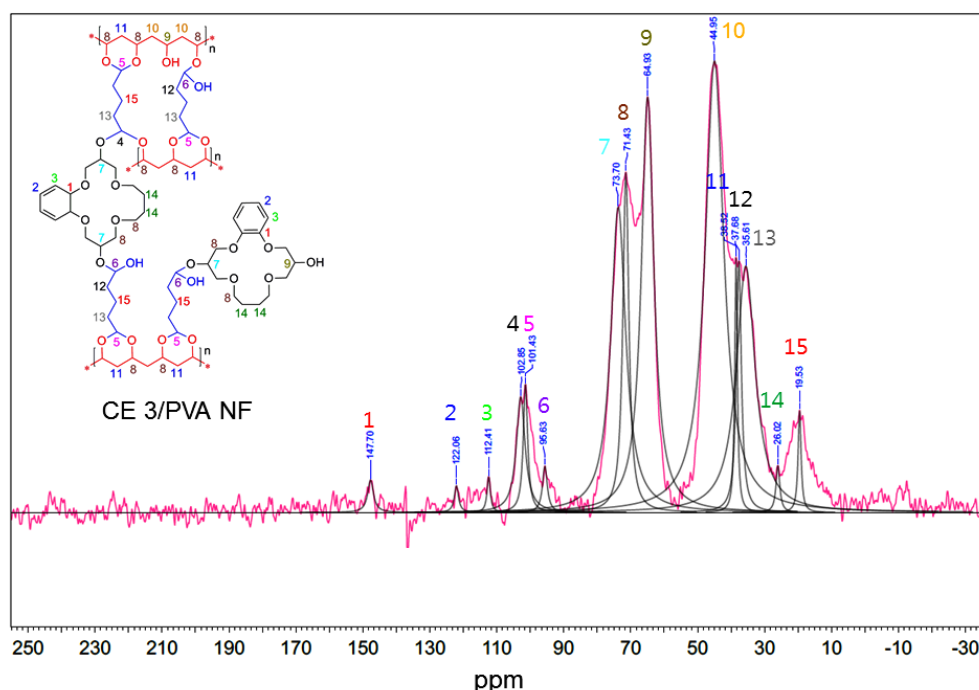

**Figure S19.** <sup>13</sup>C CP/MAS NMR of CE 3/PVA MF.

**Table S9.** Chemical shifts from <sup>13</sup>C CP/MAS NMR and peak assignments for CE 3/PVA MF.

| Crosslink Type | Peak Number | Chemical Shift (δ, ppm) | Assignments                                                                                                                                                                                    |
|----------------|-------------|-------------------------|------------------------------------------------------------------------------------------------------------------------------------------------------------------------------------------------|
|                | 1           | 147.70                  | benzyl carbon bearing ethereal O in the CEs                                                                                                                                                    |
|                | 2           | 122.06                  | benzyl carbon (C=C)                                                                                                                                                                            |
|                | 3           | 112.41                  | benzyl carbon (C=C)                                                                                                                                                                            |
| (II)           | 4           | 102.85                  | acetal carbon CE/GA/PVA linkage                                                                                                                                                                |
| (I)            | 5           | 101.43                  | acetal carbon GA/PVA linkage                                                                                                                                                                   |
| (IV)           | 6           | 95.63                   | hemi-acetal carbons between CE/GA or PVA/GA                                                                                                                                                    |
|                | 7           | 73.70                   | α-carbons of CE with O linked to acetal or hemi-acetal carbon                                                                                                                                  |
|                | 8           | 71.43                   | carbons bearing O at the butyl sub-unit of CE ring with possible overlaps with: carbons bearing O at the benzo-side of CE ring, α-carbons of PVA with O linked to acetal or hemi-acetal carbon |
| (III)          | 9           | 64.93                   | α-carbons of PVA or CE with unreacted -OH                                                                                                                                                      |
|                | 10          | 44.95                   | β-carbons of PVA with unreacted -OH                                                                                                                                                            |
|                | 11          | 38.52                   | β-carbons of crosslinked PVA                                                                                                                                                                   |
|                | 12          | 37.68                   | α-carbons of crosslinked GA (hemi-acetal carbon)                                                                                                                                               |
|                | 13          | 35.61                   | α-carbons of crosslinked GA (acetal carbon)                                                                                                                                                    |
|                | 14          | 26.02                   | CH <sub>2</sub> -CH <sub>2</sub> carbons at the butyl sub-unit of CE ring                                                                                                                      |
|                | 15          | 19.53                   | β-carbons of crosslinked GA                                                                                                                                                                    |

### Broad bands at 70 ppm region

Chemical shift predictions (Figure S20) were performed as an attempt to decouple the  $\alpha,\beta$ -carbon resonances in crosslinked PVA and in CEs. In the figure, green bars indicate downfield shifts: lower-end values indicate C peaks of pure CEs in free states [uncrosslinked] and PVA crosslinked in pure form [with GA only]; upper-end values indicate shifted C peaks when CE and PVA were crosslinked together with GA [CE-GA-PVA]. Green arrows indicate chemical shifts of C peaks in CE/PVA samples. Red bars indicate upfield shifts: upper-end values indicate C peaks of CEs in free states [uncrosslinked] and PVA crosslinked in pure form [with GA only]; lower-end values indicate shifted C peaks when CE and PVA were crosslinked together with GA [CE-GA-PVA]. Red arrows indicate chemical shifts of C peaks in CE/PVA samples.

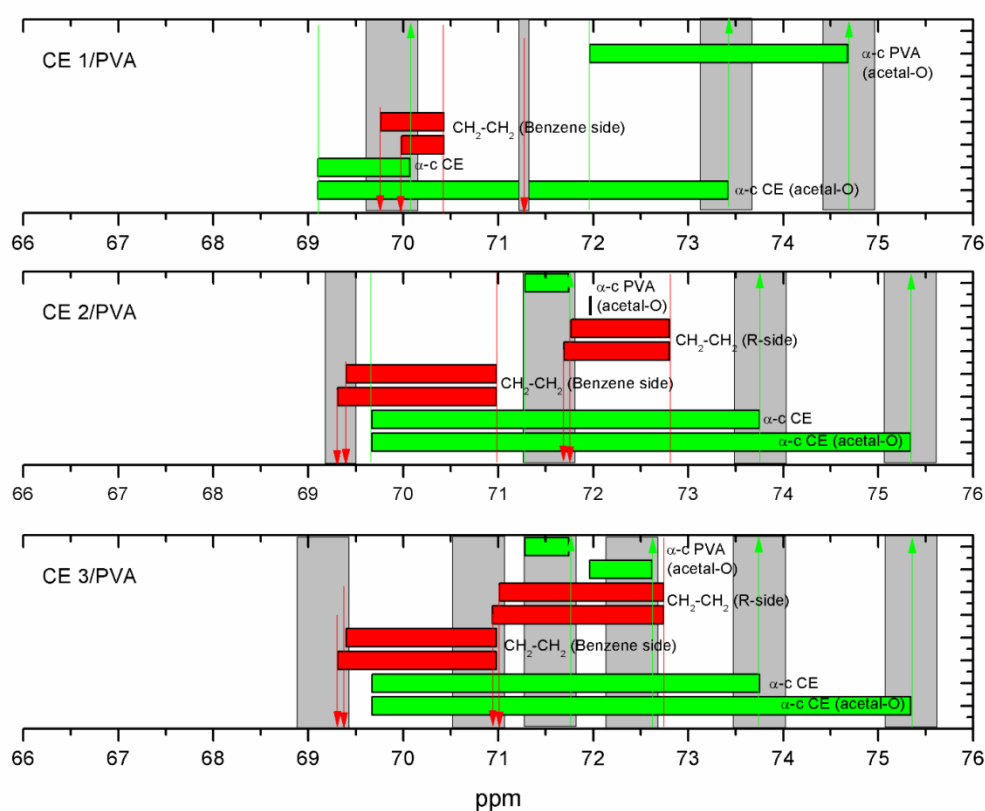

**Figure S20.** Chemical shift predications of  $\text{CH}_2\text{-CH}_2$  in CE rings and  $\alpha\text{-C}$ s in crosslinked PVA and CEs using MestRenova 11.0.2.

Simulations (Figure S20) reveal the differences in the chemical shifts of  $\alpha$ -carbons of crosslinked pure PVA of the CE/PVA samples. From the three samples, the resonance of the  $\alpha$ -carbons in PVA with acetal-linked oxygens was most unique in CE 1/PVA as it exhibited the greatest shift downfield relative to pure PVA ( $\sim +4.5$  ppm). Its signal overlapped that of the  $\alpha$ -carbons of CEs with acetal-linked oxygens (CE/GA link), which was distinct and remarkably visible at (7). Meanwhile, signals for  $\text{CH}_2\text{-CH}_2$  carbons in CE 1 which might have overlapped with the  $\alpha$ -carbons of PVA and CE 1 with hemi-acetal linked oxygens, are located upfield (8). In CE 2/PVA and CE 3/PVA, the shifts in signals of  $\alpha$ -carbons of

crosslinked PVA were not as remarkable as that in CE 1/PVA. Their signals overlapped with the CH<sub>2</sub>-CH<sub>2</sub> carbons of the CE 2 or CE 3 rings and with the  $\alpha$ -carbons of PVA with acetal and hemi-acetal linked oxygens (8). Thus, the peak shouldering downfield (7) can be distinctly assigned to the  $\alpha$ -carbon of CE 2 or CE 3 components with hemi-acetal and acetal-linked oxygens (CE/GA linkages). These results provide evidence to the successful formation of CE-GA-PVA linkages in the MF samples.

## Morphology of uncrosslinked electrospun MFs

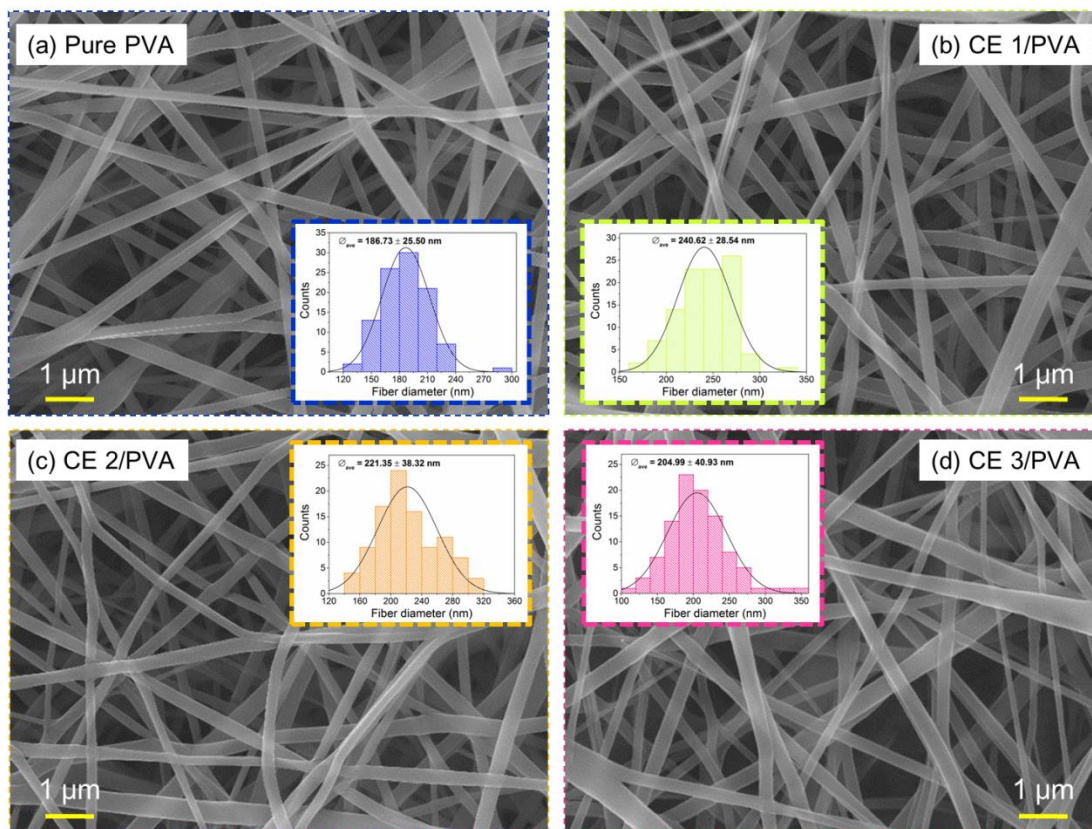

**Figure S21.** FE-SEM images of MFs before aerosol crosslinking (a) pure PVA and CE/PVA containing: (b) CE 1, (c) CE 2, and (d) CE 3. (Insets: average fiber diameter ( $\bar{\phi}_{ave}$ ) from histograms).

FE-SEM images of uncrosslinked MFs (Figure S21) reveal beadless, smooth, and well-structured fibers. In general, fiber dimensions are affected by the dope solution properties, electrospinning parameters and ambient conditions.<sup>16</sup> Since all MFs were fabricated under the same electrospinning and ambient conditions, the variations in fiber diameters ( $\bar{\phi}_{ave}$ ) must be caused by differences in dope properties which is dependent on the type of melted CEs.<sup>16</sup> The most viscous dope (CE 1/PVA) produced relatively larger fibers (Inset Figure S21b) than the least viscous solution (PVA) (Inset Figure S21a). But it is worthy to mention that a  $\Delta\bar{\phi}_{ave} \cong 60$  nm difference between freshly electrospun CE 1/PVA and pure PVA is minor.



## Surface analysis and mechanical test results of MF samples

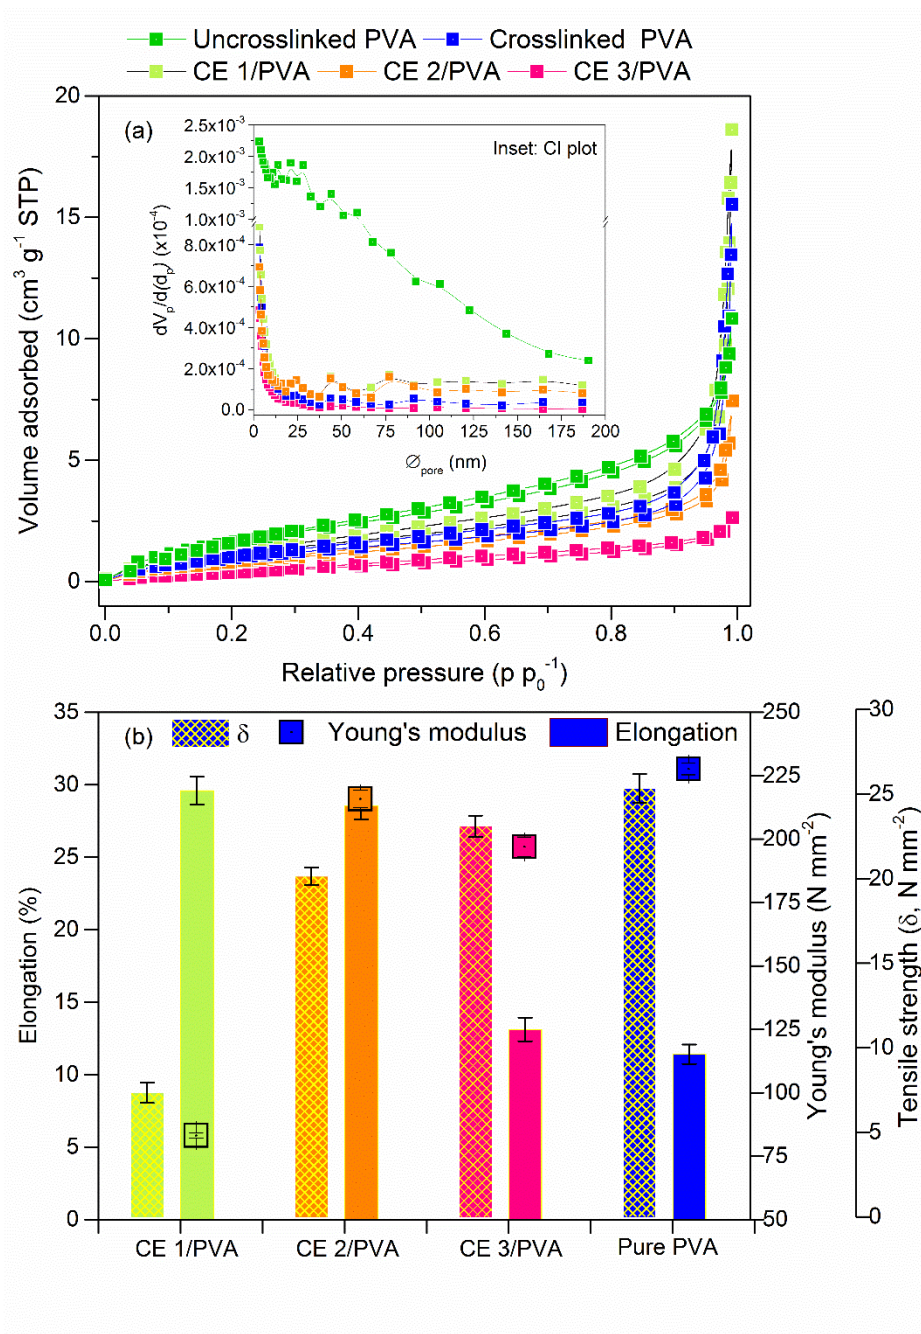

**Figure S22.** Surface and mechanical properties of MF samples. (a) N<sub>2</sub> adsorption-desorption isotherms (Inset: pore size distribution); (b) Tensile strength, % elongation and Young's modulus.

Pore size distribution (PSD) curves reveal the effect of GA crosslinking in the MFs. Uncrosslinked PVA had the most porous fibers as indicated by the significant presence of macro- ( $\varnothing_{\text{pore}} > 50 \text{ nm}$ ) and/or mesopores ( $2 \text{ nm} < \varnothing_{\text{pore}} < 50 \text{ nm}$ ) (Inset Figure S22a) in contrast to the crosslinked MFs. Among the samples, crosslinked PVA and CE 3/PVA had almost flat PSD curves. The same samples have the lowest  $v_{\text{pore}}$  values and relatively higher true densities ( $\rho_{\text{true}}$ , Table 1). These results suggest that pure PVA and CE 3/PVA have the highest fiber packing densities due to intensive GA crosslinking. Meanwhile, internal pores were slightly noticeable in CE 1/PVA and CE 2/PVA MFs as revealed by their PSD curves (Inset Figure S22a). These samples also had relatively higher  $v_{\text{pore}}$  and lower  $\rho_{\text{true}}$  (Table 1). These results imply that GA crosslinking is less intense in CE 1/PVA and CE 2/PVA.

Mechanical tests reveal the differences in the durability of the MFs (Figure S22b). CE 1/PVA and CE 2/PVA were easier to deform (% elongation) than CE 3/PVA and pure PVA, which can be attributed to the higher fiber packing density of the latter two samples. Meanwhile, larger fibers mean lower number of fiber-to-fiber contacts. Hence, CE 1/PVA which had the largest  $\varnothing_{\text{ave}}$  exhibited the lowest  $\delta$ .<sup>17</sup> Having the highest % elongation and lowest  $\delta$ , CE 1/PVA also had the lowest Young's modulus among the MFs. Nonetheless, the mechanical properties of all samples including CE 1/PVA are sufficient for their intended application as adsorbents.

### Adsorption properties: Effect of solution pH on $\text{Li}^+$ adsorption

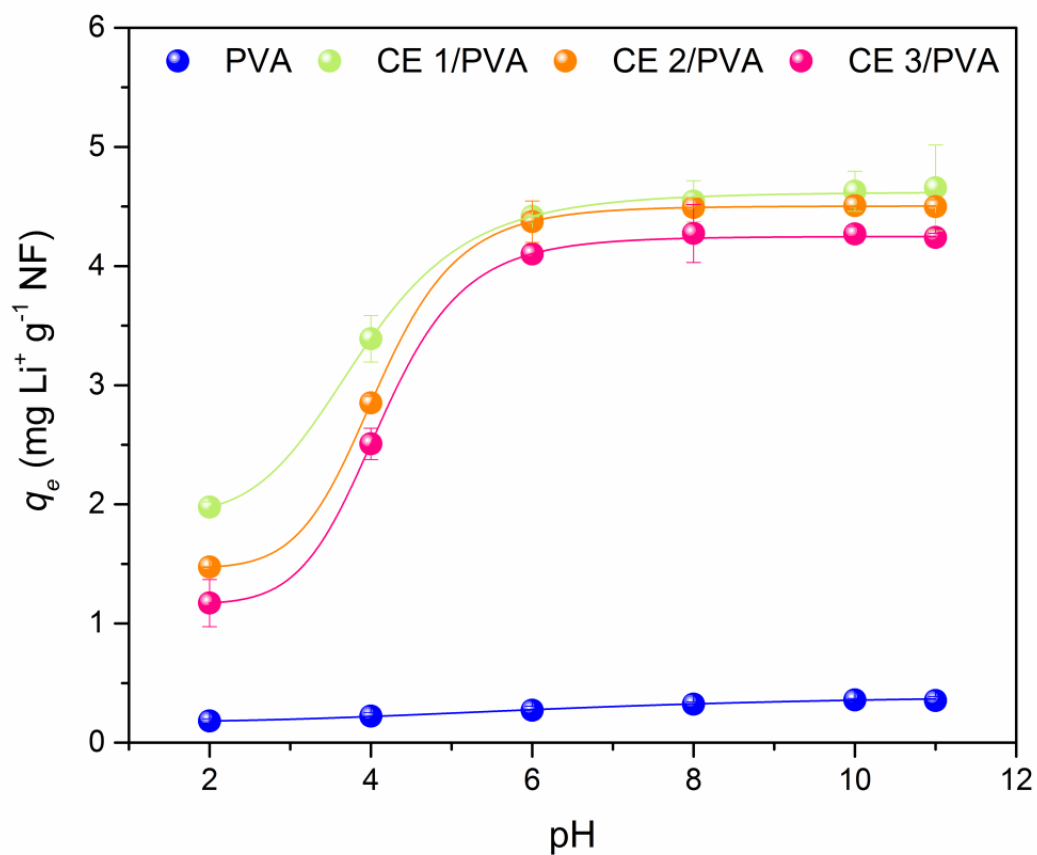

**Figure S23.** Adsorption results at varied solution pH ( $C_0 = 7.35 \text{ mg L}^{-1}$ ;  $m \cong 30 \text{ mg}$ ;  $V = 50 \text{ mL}$ ;  $T = 30^\circ\text{C}$ ).

### Adsorption properties: Non-linear $\text{Li}^+$ adsorption kinetic models

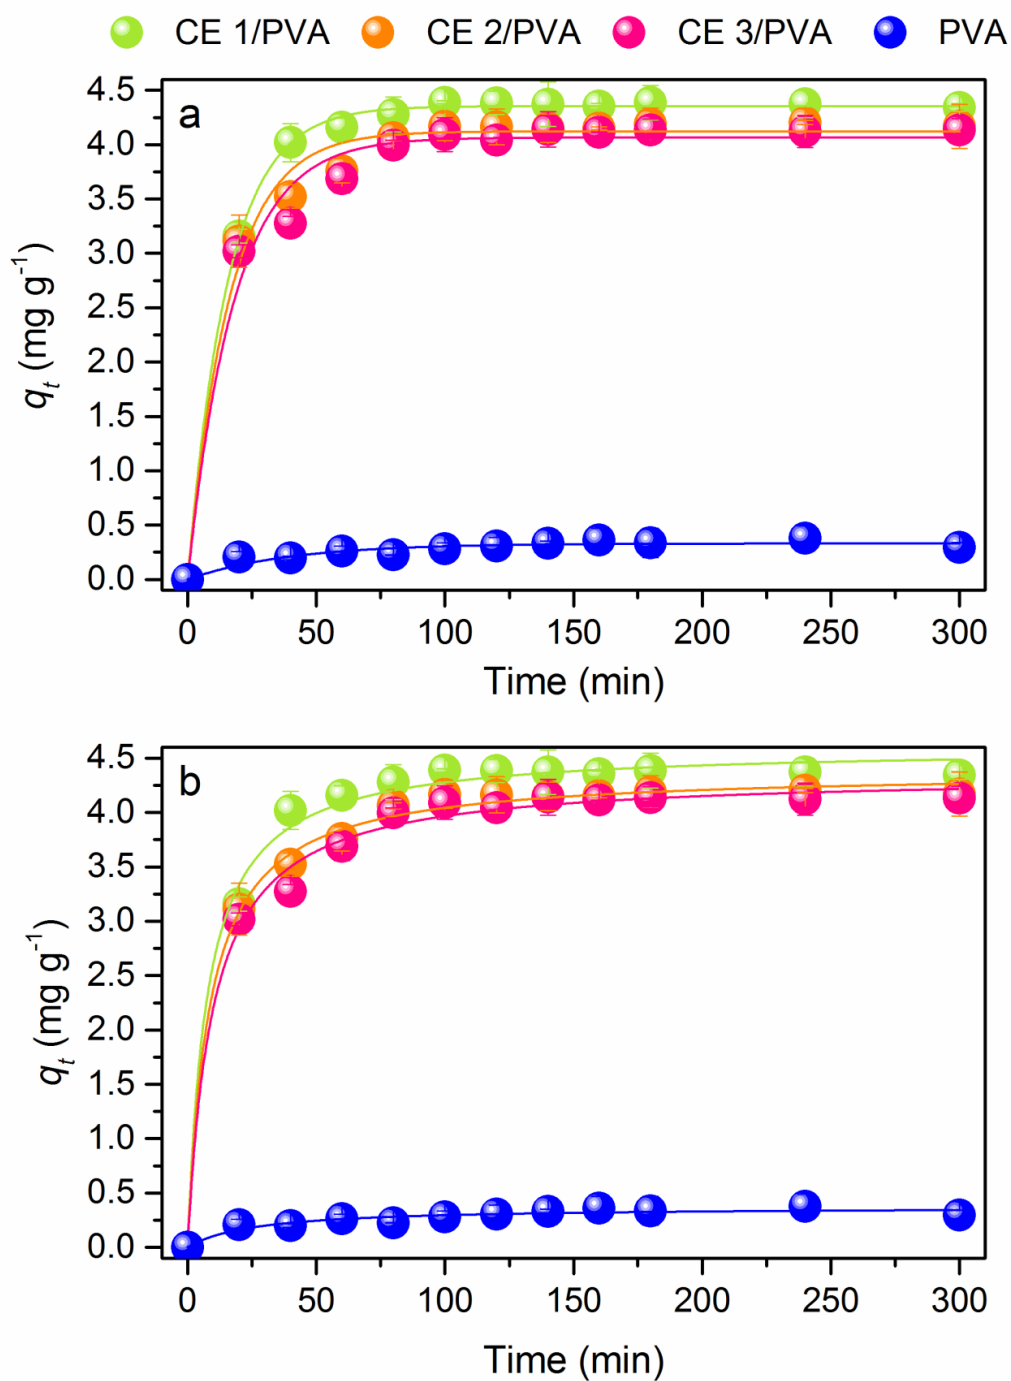

**Figure S24.** Kinetic rate models for  $\text{Li}^+$  adsorption in CE/PVA and pure PVA MFs: (a) pseudo-first and (b) pseudo-second order. ( $C_0 = 7.35 \text{ mg L}^{-1}$ ;  $m \cong 30 \text{ mg}$ ;  $V = 50 \text{ mL}$ ;  $T = 30^\circ\text{C}$ ;  $\text{pH} = 8.1$ ).

**Table S10.** Li<sup>+</sup> adsorption performance of inorganic LIS reported in literature.

| LIS                                                                    | Support              | Loading content | Delithiation Efficiency         | $C_o$ (mg L <sup>-1</sup> ) | $q_e$ (mg g <sup>-1</sup> ) | Stabilization time (h)         | Reference |
|------------------------------------------------------------------------|----------------------|-----------------|---------------------------------|-----------------------------|-----------------------------|--------------------------------|-----------|
| $\lambda$ -MnO <sub>2</sub>                                            | None – powder type   | 100.00%         | -                               | 0.15                        | 0.72                        | 3000<br><u>Low kinetics</u>    | 18        |
| H <sub>1.39</sub> Li <sub>0.01</sub> Mn <sub>1.65</sub> O <sub>4</sub> | None – powder type   | 100.00%         | -                               | 0.17                        | 8.00                        | 5<br><i>Moderate kinetics</i>  | 19        |
| H <sub>1.6</sub> Mn <sub>1.6</sub> O <sub>4</sub>                      | None – powder type   | 100.00%         | 99.00%                          | 0.17                        | 40.90                       | 48                             | 20        |
| H <sub>1.6</sub> Mn <sub>1.6</sub> O <sub>4</sub>                      | None – powder type   | 100.00%         | 99.00%                          | 5.00                        | 37.00                       | -                              | 21        |
| H <sub>1.6</sub> Mn <sub>1.6</sub> O <sub>4</sub>                      | None – powder type   | 100.00%         | 98.00%                          | 68.85                       | 3.62                        | -                              | 22        |
| HMn <sub>2</sub> O <sub>4</sub>                                        | None – powder type   | 100.00%         | 40.00%<br><u>Low efficiency</u> | 6.94                        | 10.41                       | 12<br><i>Moderate kinetics</i> | 23        |
| H <sub>2</sub> TiO <sub>3</sub>                                        | None – powder type   | 100.00%         | 96.62%                          | 15.40                       | 7.64                        | 24<br><u>Low kinetics</u>      | 24        |
| H <sub>1.33</sub> Mn <sub>1.67</sub> O <sub>4</sub>                    | chitosan             | 80.60%          | 93.00%                          | 30.00                       | 10.20                       | 168<br><u>Low kinetics</u>     | 25        |
| H <sub>1.33</sub> Mn <sub>1.67</sub> O <sub>4</sub>                    | polyvinyl chloride   | 80.00%          | 90.00%                          | 0.17                        | 10.60                       | 360<br><u>Low kinetics</u>     | 26        |
| H <sub>1.6</sub> Mn <sub>1.6</sub> O <sub>4</sub>                      | polyvinyl chloride   | 15.00%          | -                               | 54.20                       | 5.02                        | -                              | 27        |
| H <sub>1.6</sub> Mn <sub>1.6</sub> O <sub>4</sub>                      | poly(acrylo nitrile) | 37.50%          | 88.70%                          | 15.34                       | 7.43                        | 12<br><i>Moderate kinetics</i> | 28        |
| H <sub>1.6</sub> Mn <sub>1.6</sub> O <sub>4</sub>                      | polyvinyl alcohol    | 71.42%          | -                               | 11.68                       | 6.82                        | -                              | 10        |
| HMn <sub>2</sub> O <sub>4</sub>                                        | pitch                | 25.00%          | 93.00%                          | 237.00                      | 1.50                        | -                              | 29        |
| HMn <sub>2</sub> O <sub>4</sub>                                        | agar                 | 98.00%          | -                               | 0.17                        | 3.40                        | -                              | 30        |
| HMn <sub>2</sub> O <sub>4</sub>                                        | magnetite            | 50.00%          | -                               | 0.70                        | 1.20                        | -                              | 31        |
| H <sub>4</sub> Mn <sub>5</sub> O <sub>12</sub>                         | polyvinyl chloride   | 80.00%          | -                               | 222.08                      | 12.44                       | 72<br><u>Low kinetics</u>      | 32        |
| H <sub>2</sub> TiO <sub>3</sub>                                        | polyvinyl alcohol    | 72.00%          | 97.00%                          | 15.00                       | 12.84                       | 12<br><i>Moderate kinetics</i> | 33        |

**Adsorption properties: Theoretical adsorption capacities of CEs ( $q_{theo}$ )**

**Table S11.** Theoretical adsorption capacities of pure CEs.

| Type            | Structure                                                                           | MW<br>(g mol <sup>-1</sup> ) | $q_{theo}$ (mg Li <sup>+</sup> g <sup>-1</sup> CE)    |                                                           |
|-----------------|-------------------------------------------------------------------------------------|------------------------------|-------------------------------------------------------|-----------------------------------------------------------|
|                 |                                                                                     |                              | 1 mole of CE<br>with mole of Li <sup>+</sup><br>(1:1) | 2 moles of CEs<br>with 1 mole of Li <sup>+</sup><br>(2:1) |
| CE 1            | 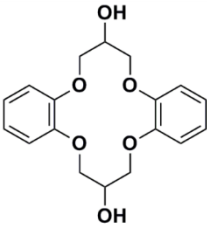   | 332.34                       | 20.89                                                 | 10.44                                                     |
| CE 2            |   | 326.38                       | 21.27                                                 | 10.63                                                     |
| CE 3            |  | 312.35                       | 22.22                                                 | 11.11                                                     |
| Li <sup>+</sup> |                                                                                     | 6.941                        |                                                       |                                                           |

Adsorption properties: Non-linear  $\text{Li}^+$  adsorption isotherm models

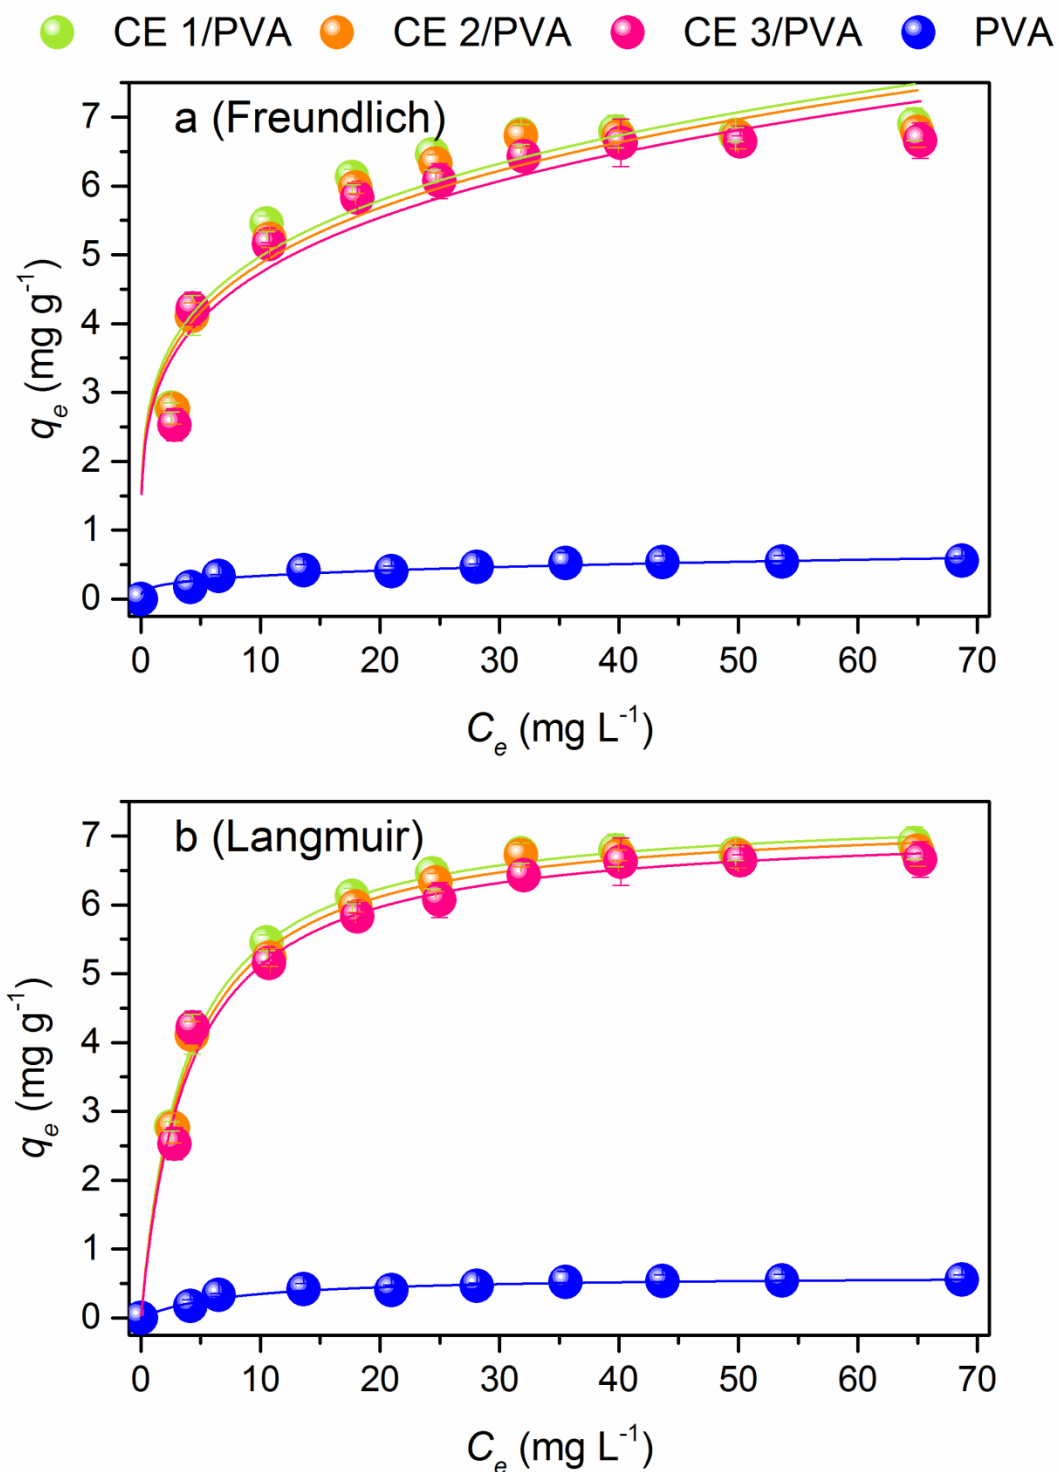

**Figure S25.** Isotherm models for  $\text{Li}^+$  adsorption in CE/PVA and pure PVA MFs: (a) Freundlich (b) Langmuir. ( $C_0 = 3 - 70 \text{ mg L}^{-1}$ ;  $m \cong 30 \text{ mg}$ ;  $V = 50 \text{ mL}$ ;  $T = 30^\circ\text{C}$ ;  $\text{pH} = 8.0$ ).

**Table S12.** Li<sup>+</sup> adsorption performance of CE-based Li<sup>+</sup> adsorbents reported in literature.

| CE Type | CE Name                        | Support                                                | Nominal CE loading (mmole g <sup>-1</sup> ) | Actual CE loading (mmole g <sup>-1</sup> )     | Fabrication CE loss (%)           | $q_{theo}$ (mg g <sup>-1</sup> ) | $q_e$ (mg g <sup>-1</sup> ) | Adsorption loss (%)                    | $C_a$ (mg L <sup>-1</sup> ) | Stabilization time (min) | Reference  |
|---------|--------------------------------|--------------------------------------------------------|---------------------------------------------|------------------------------------------------|-----------------------------------|----------------------------------|-----------------------------|----------------------------------------|-----------------------------|--------------------------|------------|
| CE 12   | CE with pendant vinyl group    | Silica gel                                             | 0.18                                        | 0.18<br><u>Low CE loading</u>                  | -                                 | 1.24                             | 0.01                        | 98.83<br><u>High adsorption loss</u>   | 0.14                        | -                        | 34         |
| CE 12   | 2-Hydroxymethyl-12-crown-4     | SBA-15                                                 | 0.89                                        | 0.87<br><u>Moderate CE loading</u>             | 2.24<br><b>Low CE loss</b>        | 6.00                             | 7.63                        | +27 % excess<br><u>Low selectivity</u> | 34.70                       | -                        | 35         |
| CE 12   | 2-(allyloxy) methyl-12-crown-4 | Magnetite                                              | 0.61                                        | 0.61<br><u>Low CE loading</u>                  | -                                 | 4.24                             | 4.03                        | 5.11<br><b>Low adsorption loss</b>     | 3.47                        | 10                       | 36         |
| CE 14   | CE with pendant vinyl group    | Silica gel                                             | 0.17                                        | 0.17<br><u>Low CE loading</u>                  | -                                 | 1.17                             | 0.05                        | 96.01<br><u>High adsorption loss</u>   | 0.14                        | -                        | 34         |
| CE 14   | Hydroxy-dibenzo-14-crown-4     | MWCNT                                                  | 2.27                                        | 1.71<br><b>High CE loading</b>                 | 24.57<br><u>Moderate CE loss</u>  | 11.87                            | 5.41                        | 54.39<br><u>High adsorption loss</u>   | 111                         | -                        | 37         |
| CE 14   | Hydroxy-dibenzo-14-crown-4     | MWCNT                                                  | 2.27                                        | 1.71<br><b>High CE loading</b>                 | 24.57<br><u>Moderate CE loss</u>  | 11.87                            | 2.50                        | 78.93<br><u>High adsorption loss</u>   | 35                          | -                        | 37         |
| CE 14   | Methyl-14-crown-4-OH           | Poly(glycidyl methacrylate) PGMA                       | 2.50                                        | 0.44<br><u>Low CE loading</u>                  | 82.4<br><u>High CE loss</u>       | 3.05                             | 3.05                        | -                                      | 694                         | -                        | 38         |
| CE 14   | 2HDB14C4                       | Glutaraldehyde/polyvinyl alcohol (GA/PVA)              | 1.00                                        | 1.001<br><b>High CE loading</b>                | 0.23<br><b>Negligible CE loss</b> | 6.96                             | 6.90                        | 0.93<br><b>Low adsorption loss</b>     | 70                          | 120                      | This study |
| CE 14   | 2HDB14C4                       |                                                        | -                                           | -                                              | -                                 | 6.53                             | 6.51                        | 0.35<br><b>Low adsorption loss</b>     | 70                          | 120                      | This study |
| CE 15   | Benzo-15-Crown-5               | Mesoporous silica                                      | 2.3x10 <sup>-3</sup>                        | 2.94x10 <sup>-5</sup><br><u>Low CE loading</u> | 98.73<br><u>High CE loss</u>      | 0.20                             | 0.18                        | 11.39<br><b>Low adsorption loss</b>    | 139                         | 480                      | 39         |
| CE 15   | Diamino-dibenzo-15-crown-5     |                                                        | 1.77                                        | 1.77<br><b>High CE loading</b>                 | -                                 | 12.25                            | 3.43                        | 72.00<br><u>High adsorption loss</u>   | 6940                        | -                        | 40         |
| CE 15   | 2HB2M15C4                      | Glutaraldehyde/polyvinyl alcohol (GA/PVA)              | 1.02                                        | 1.016<br><b>High CE loading</b>                | 0.54<br><b>Negligible CE loss</b> | 7.08                             | 6.78                        | 4.30<br><b>Low adsorption loss</b>     | 70                          | 120                      | This study |
| CE 15   | 2HB2M15C4                      |                                                        | -                                           | -                                              | -                                 | 6.61                             | 6.40                        | 3.17<br><b>Low adsorption loss</b>     | 70                          | 120                      | This study |
| CE 16   | Dibenzo-16-crown 5             | Condensation polymerization (formaldehyde/formic acid) | 2.39                                        | 1.75<br><b>High CE loading</b>                 | 26.77<br><u>Moderate CE loss</u>  | 12.15                            | 2.29                        | 81.14<br><u>High adsorption loss</u>   | 694                         | -                        | 41         |
| CE 16   | Dibenzo-16-crown 5             | Condensation polymerization (formaldehyde/formic acid) | 2.17                                        | 1.46<br><b>High CE loading</b>                 | 32.76<br><u>Moderate CE loss</u>  | 10.13                            | 1.60                        | 84.25<br><u>High adsorption loss</u>   | 694                         | -                        | 41         |
| CE 16   | 2HB16C4                        | Glutaraldehyde/polyvinyl alcohol (GA/PVA)              | 1.07                                        | 1.066<br><b>High CE loading</b>                | 0.12<br><b>Negligible CE loss</b> | 7.41                             | 6.66                        | 10.08<br><b>Low adsorption loss</b>    | 70                          | 120                      | This study |
| CE 16   | 2HB16C4                        |                                                        | -                                           | -                                              | -                                 | 6.96                             | 6.27                        | 9.75<br><b>Low adsorption loss</b>     | 70                          | 120                      | This study |
| CE 18   | Dibenzo-18-crown-6             | Polyacrylo-nitrile                                     | 0.25                                        | 0.25<br><u>Low CE loading</u>                  | -                                 | 1.75                             | 1.11                        | 36.63<br><u>High adsorption loss</u>   | 69.40                       | 480                      | 7          |
| CE 18   | Diamino-dibenzo-18-crown-6     | Biphenyl Tetracarboxylic Acid                          | 1.46                                        | 1.46<br><b>High CE loading</b>                 | -                                 | 10.14                            | 3.95                        | 60.99<br><u>High adsorption loss</u>   | 6940                        | -                        | 40         |
| CE 18   | Diaza-18-crown-6               | Dianhydride (BPDA)                                     | 1.80                                        | 1.80<br><b>High CE loading</b>                 | -                                 | 12.47                            | 2.99                        | 75.99<br><u>High adsorption loss</u>   | 6940                        | -                        | 40         |

**Legends:**

<sup>+</sup> Theoretical  $q_e$  = actual CE loading (mmol g<sup>-1</sup>) × 6.941 mg mmol<sup>-1</sup>

<sup>+</sup> Experimental  $q_e$  as mg Li<sup>+</sup> g<sup>-1</sup> MF

**For selected entries (CE adsorption contributions on  $q_e$  of CE/PVA MFs):**

<sup>#</sup> Theoretical  $q_e = q_{theo} \cdot f'_{CE} \rightarrow (q_{theo} \text{ values are listed in Table S10 for 1:1 complexation})$

<sup>#</sup> Experimental  $q_e = q_{CE} \cdot f'_{CE} \rightarrow \text{CE adsorption contribution defined in Eq. 7 of main article}$

Stabilization time – onset of equilibrium time



### Density Functional Theory calculations

**Table S13.** Average opposite O distances, [O-O]<sub>ave</sub> before and after complexation of CEs with M<sup>n+</sup>.

| CE                                                                                | Free CE<br>[O-O] <sub>ave</sub> | CE-Li <sup>+</sup><br>[O-O] <sub>ave</sub> | CE-Na <sup>+</sup><br>[O-O] <sub>ave</sub> | CE-K <sup>+</sup><br>[O-O] <sub>ave</sub> | CE-Mg <sup>2+</sup><br>[O-O] <sub>ave</sub> | CE-Ca <sup>2+</sup><br>[O-O] <sub>ave</sub> | Free CE<br>cavity size |
|-----------------------------------------------------------------------------------|---------------------------------|--------------------------------------------|--------------------------------------------|-------------------------------------------|---------------------------------------------|---------------------------------------------|------------------------|
| CE 1                                                                              | 3.87±0.00                       | 3.83±0.00                                  | 3.87±0.01                                  | 3.79±0.00                                 | 3.85±0.00                                   | 3.91±0.00                                   | 1.23±0.00              |
| CE 2                                                                              | 4.16±0.01                       | 3.98±0.16                                  | 4.16±0.06                                  | 4.08±0.14                                 | 4.01±0.13                                   | 4.10±0.00                                   | 1.52±0.01              |
| CE 3                                                                              | 4.43±0.02                       | 4.16±0.52                                  | 4.45±0.13                                  | 4.44±0.08                                 | 4.08±0.33                                   | 4.39±0.11                                   | 1.79±0.02              |
| <b>Estimated cavity size after 1:1 CE-M<sup>n+</sup> complexation<sup>a</sup></b> |                                 |                                            |                                            |                                           |                                             |                                             |                        |
| CE                                                                                | CE-Li <sup>+</sup>              | CE-Na <sup>+</sup>                         | CE-K <sup>+</sup>                          | CE-Mg <sup>2+</sup>                       | CE-Ca <sup>2+</sup>                         | Average                                     |                        |
| CE 1                                                                              | 1.19±0.00                       | 1.23±0.00                                  | 1.15±0.00                                  | 1.21±0.00                                 | 1.27±0.00                                   | 1.21±0.04                                   |                        |
| CE 2                                                                              | 1.34±0.16                       | 1.52±0.06                                  | 1.44±0.14                                  | 1.52±0.01                                 | 1.46±0.00                                   | 1.45±0.07                                   |                        |
| CE 3                                                                              | 1.52±0.52                       | 1.81±0.13                                  | 1.80±0.08                                  | 1.56±0.16                                 | 1.79±0.06                                   | 1.70±0.14                                   |                        |

<sup>a</sup> Estimated cavity size by the distance of two opposite ethereal O atoms [O-O]<sub>ave</sub> of the free or CE-M<sup>n+</sup> complex subtracted by the effective ionic radius of ethereal O (1.32 Å). Cavity size = [O-O]<sub>ave</sub> – (1.32x2), for the two ethereal O atoms.<sup>42</sup>

A reduction or expansion of the CE ring suggests conformational change in its structure to accommodate the M<sup>n+</sup>.<sup>19</sup> In general, all CEs had reduced CE cavities after M<sup>n+</sup> complexation except for Ca<sup>2+</sup> which caused CE 1 to expand, same as Na<sup>+</sup> and K<sup>+</sup> in CE 3. Meanwhile, all M<sup>n+</sup> except for Na<sup>+</sup> reduced the cavity size of CE 2. The least changes in CE cavities were observed in CE 1, which confirms that the dibenzo units rigidified its ring most effectively. On the other hand, the bulky sub-unit on one side of CE 2 resulted in its moderate conformational change while the flexible butyl chain in CE 3 permitted the greatest movement of its ring.<sup>42</sup>

**Table S14.** O-M<sup>n+</sup> distances (Å) of CE-M<sup>n+</sup> complexes calculated using DFT PBE-PAW level of theory.

| CE   | O-Li <sup>+</sup> |            | O-Na <sup>+</sup> |            | O-K <sup>+</sup> |            | O-Mg <sup>2+</sup> |            | O-Ca <sup>2+</sup> |            |
|------|-------------------|------------|-------------------|------------|------------------|------------|--------------------|------------|--------------------|------------|
|      | Bulky side        | Rigid side | Bulky side        | Rigid side | Bulky side       | Rigid side | Bulky side         | Rigid side | Bulky side         | Rigid side |
| CE 1 | 1.93±0.01         | 1.93±0.01  | 2.29±0.01         | 2.29±0.01  | 2.71±0.01        | 2.71±0.01  | 2.02±0.01          | 2.02±0.01  | 2.27±0.00          | 2.27±0.00  |
| CE 2 | 2.00±0.01         | 2.04±0.04  | 2.25±0.00         | 2.24±0.01  | 2.69±0.01        | 2.67±0.01  | 2.02±0.03          | 2.07±0.02  | 2.26±0.01          | 2.27±0.00  |
| CE 3 | 2.14±0.07         | 2.06±0.00  | 2.27±0.00         | 2.26±0.00  | 2.71±0.01        | 2.68±0.01  | 2.05±0.03          | 2.09±0.01  | 2.34±0.01          | 2.34±0.01  |

Bulky side O-M<sup>n+</sup> distances refers to the distance between M<sup>n+</sup> and ethereal O atoms near the bulky subunit structure while the rigid side O-M<sup>n+</sup> distance refers to the ethereal O atoms near the aromatic group.

The O-M<sup>+</sup> distances varied according to the M<sup>n+</sup> which generally increased with the ionic size. The trend was easily seen in CE 1 which has a symmetric ring, it also showed the same O-M<sup>n+</sup> distances on its both sides for each type of M<sup>n+</sup>. Meanwhile CE 2 was able to block larger M<sup>n+</sup>. The higher O-M<sup>+</sup> distances at its bulky side suggest repulsion of M<sup>n+</sup> towards the benzyl group, which reduce the stability of the complexes particularly those of Na<sup>+</sup> and K<sup>+</sup>. In contrast, smaller M<sup>n+</sup> like Li<sup>+</sup> and Mg<sup>2+</sup> were closer to the bulky side suggesting more stable complexes. Meanwhile, the butyl side of CE 3 exhibited better accommodation for Mg<sup>2+</sup> than Li<sup>+</sup>. It also showed low blockage response to larger M<sup>n+</sup> suggesting its relatively lower ability to discriminate ions according to their size than CE 1 and CE 2.

### Optimized Structures of CE diols

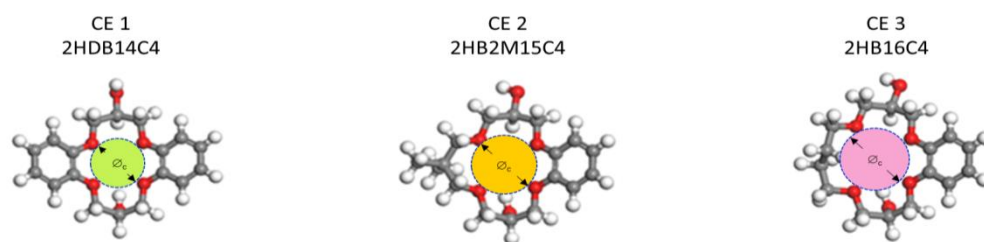

### Optimized Structures of 1:1 CE-M<sup>n+</sup> complex

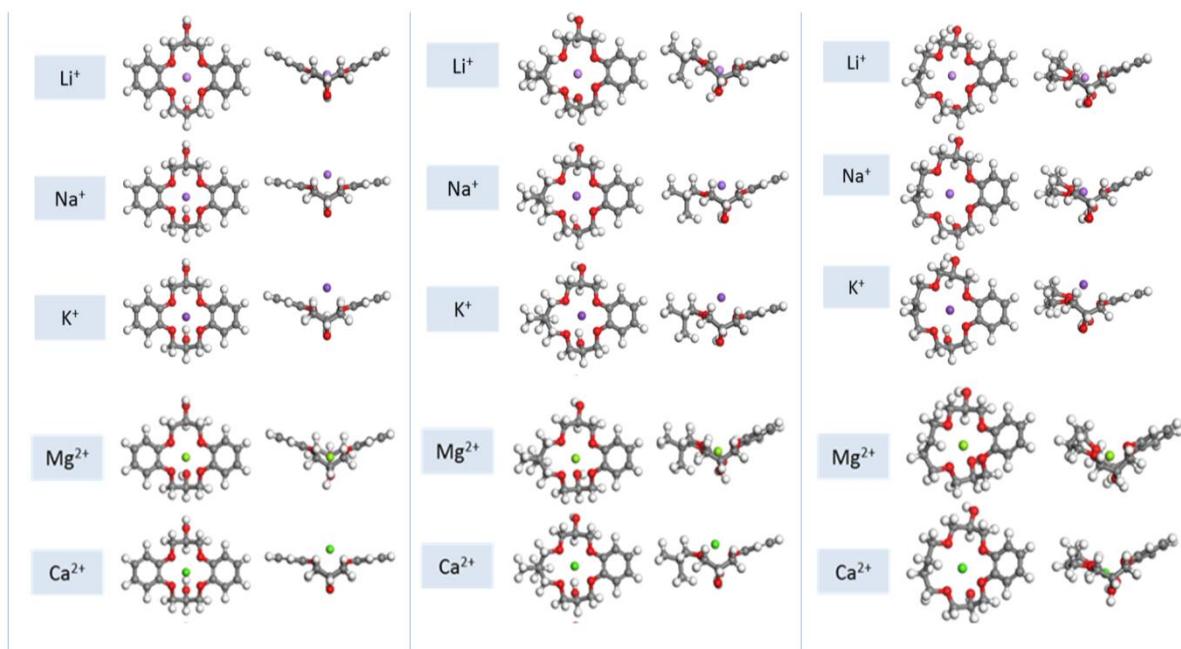

**Figure S26.** Lowest energy conformation of free and 1:1 CE-M<sup>n+</sup> complexed optimized using DFT PBE-PAW level of theory.

### Exothermicity of exchange of reactions

$$\Delta H_n = \Delta H[M^{n+}(CE)] + \Delta H[Li^+(H_2O)_n] - \Delta H[Li^+(CE)] - \Delta H[M^{n+}(H_2O)_n]$$

**Table S15.** Binding enthalpies ( $\Delta H$ ) for the  $M^{n+}$  (CE) complexes.

| CE   | $\Delta H_{Li}$<br>(kcal mol <sup>-1</sup> ) | $\Delta H_{Na}$<br>(kcal mol <sup>-1</sup> ) | $\Delta H_K$<br>(kcal mol <sup>-1</sup> ) | $\Delta H_{Mg}$<br>(kcal mol <sup>-1</sup> ) | $\Delta H_{Ca}$<br>(kcal mol <sup>-1</sup> ) |
|------|----------------------------------------------|----------------------------------------------|-------------------------------------------|----------------------------------------------|----------------------------------------------|
| CE 1 | -80.54                                       | -46.29                                       | -27.18                                    | -247.17                                      | -150.44                                      |
| CE 2 | -91.16                                       | -54.09                                       | -32.94                                    | -263.35                                      | -162.13                                      |
| CE 3 | -81.90                                       | -59.23                                       | -37.43                                    | -262.93                                      | -192.41                                      |

**Table S16.** Binding enthalpies ( $\Delta H$ ) for the  $M^{n+}(H_2O)_n$  where  $n=6$ .<sup>43</sup>

| Metal Ion        | $\Delta H$<br>(kcal mol <sup>-1</sup> ) |
|------------------|-----------------------------------------|
| Li <sup>+</sup>  | -122.9                                  |
| Na <sup>+</sup>  | -95.6                                   |
| K <sup>+</sup>   | -79.9                                   |
| Cs <sup>+</sup>  | -64.0                                   |
| Mg <sup>2+</sup> | -316.5                                  |
| Ca <sup>2+</sup> | -245.3                                  |
| Sr <sup>2+</sup> | -213.6                                  |

**Table S17.**  $\Delta H_n$  values of  $M^{n+}$  relative to  $Li^+$  ( $\Delta H_n = 0$  kcal mol<sup>-1</sup>).

| CE          | $\Delta H_n (Li^+ - Li^+)$<br>kcal mol <sup>-1</sup> | $\Delta H_n (Li^+ - Na^+)$<br>kcal mol <sup>-1</sup> | $\Delta H_n (Li^+ - K^+)$<br>kcal mol <sup>-1</sup> | $\Delta H_n (Li^+ - Mg^{2+})$<br>kcal mol <sup>-1</sup> | $\Delta H_n (Li^+ - Ca^{2+})$<br>kcal mol <sup>-1</sup> |
|-------------|------------------------------------------------------|------------------------------------------------------|-----------------------------------------------------|---------------------------------------------------------|---------------------------------------------------------|
| <b>CE 1</b> | 0.00                                                 | 6.95                                                 | 10.36                                               | 37.59                                                   | 63.12                                                   |
| <b>CE 2</b> | 0.00                                                 | 9.77                                                 | 15.22                                               | 21.41                                                   | 51.43                                                   |
| <b>CE 3</b> | 0.00                                                 | -4.63                                                | 1.47                                                | 21.83                                                   | 21.15                                                   |

### Recycling experiments

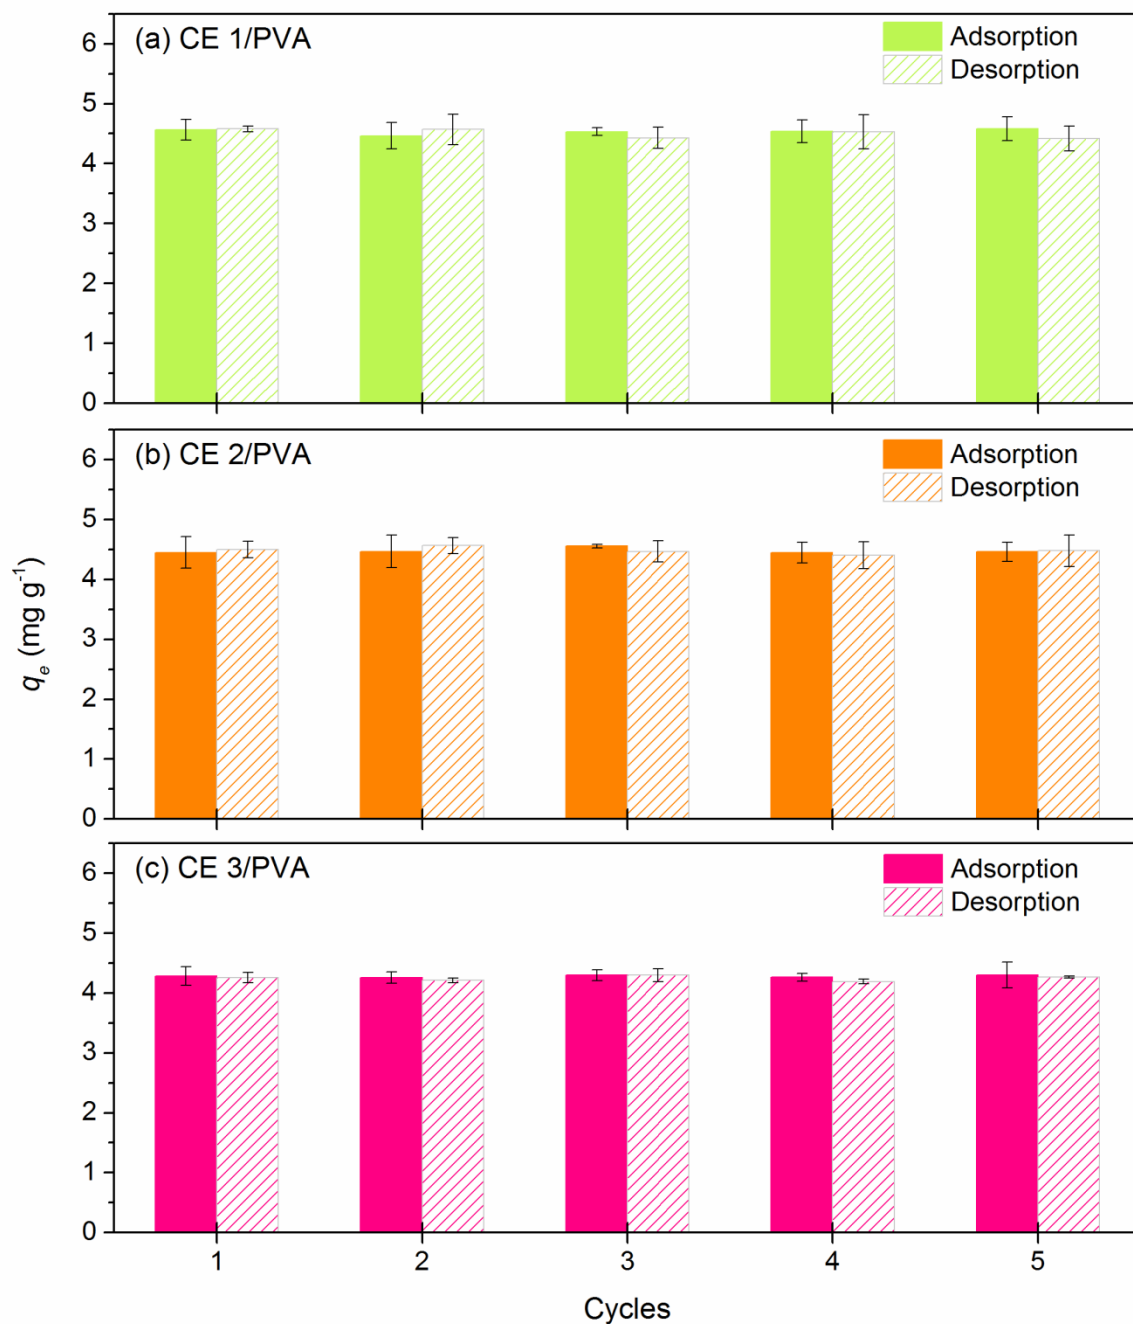

**Figure S27.** Cycled  $\text{Li}^+$  adsorption/desorption runs for regenerability tests of the CE/PVA MFs: (a) CE 1/PVA (b) CE 2/PVA and (c) CE 3/PVA. ( $C_0 = 6.7 \text{ mg L}^{-1}$ ;  $m \cong 30 \text{ mg}$ ;  $V = 50 \text{ mL}$ ;  $T = 30^\circ\text{C}$ ;  $\text{pH} = 8.0$ ).

### MF autopsy after five adsorption/desorption cycles

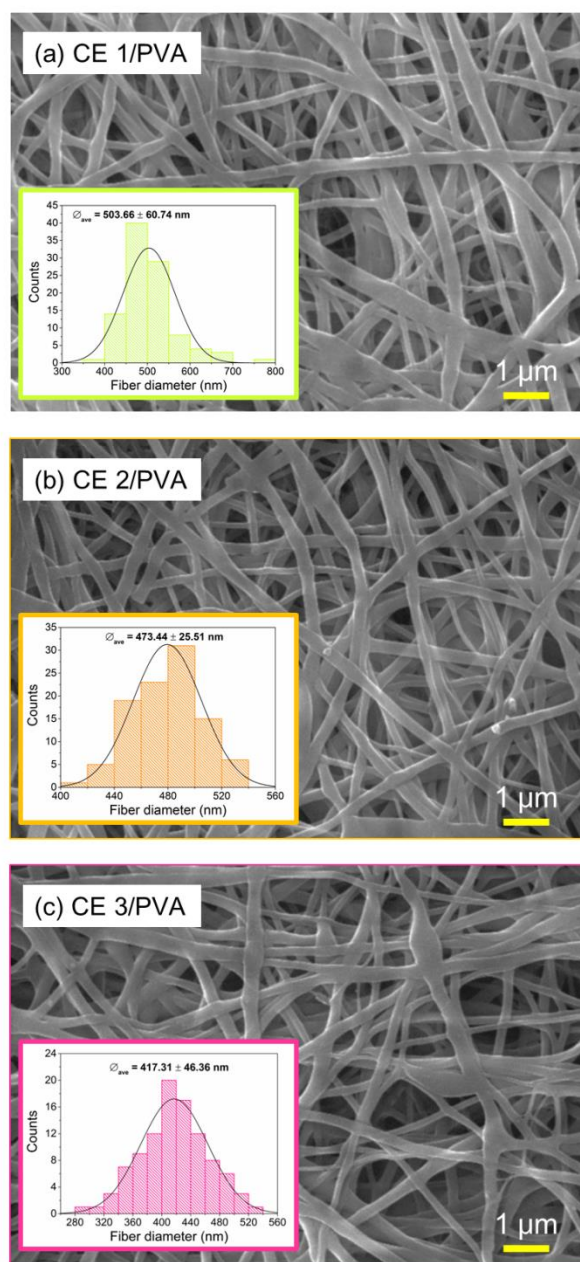

**Figure S28.** SEM images of used CE/PVA MFs after 5<sup>th</sup> adsorption/desorption cycle: (a) CE 1/PVA (b) CE 2/PVA and (c) CE 3/PVA.

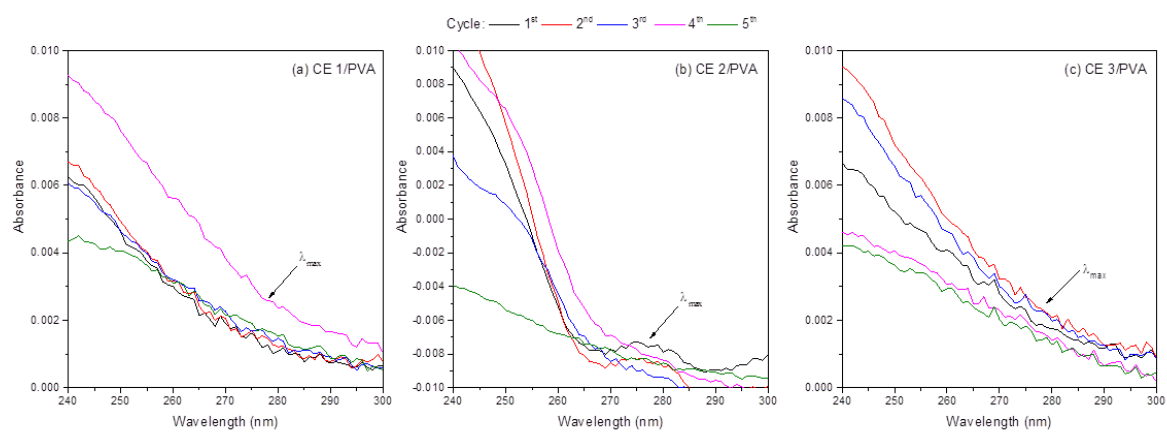

**Figure S29.** UV-Vis spectra of stripping solutions (0.5 M HCl) used to desorb  $\text{Li}^+$  from spent CE/PVA MFs (for eluted CE detection): (a) CE 1/PVA (b) CE 2/PVA and (c) CE 3/PVA.



## Nomenclature:

| <i>Symbols</i> | <i>Description</i>                                                                         |
|----------------|--------------------------------------------------------------------------------------------|
| $\varnothing$  | – diameter ( $\text{\AA}$ or mm)                                                           |
| [ ]            | – concentration ( $\text{mg L}^{-1}$ )                                                     |
| $\Delta$       | – difference                                                                               |
| $\delta$       | – tensile strength ( $\text{N mm}^{-2}$ )                                                  |
| $\delta$       | – chemical shift (ppm)                                                                     |
| $\rho$         | – density ( $\text{g cm}^{-3}$ )                                                           |
| $\lambda$      | – wavelength in UV-Vis spectrophotometer analysis (nm)                                     |
| $\alpha$       | – separation factor                                                                        |
| $a$            | – area ( $\text{cm}^2$ )                                                                   |
| Abs            | – absorbance (AU)                                                                          |
| $C$            | – concentration ( $\text{mg L}^{-1}$ )                                                     |
| $f$            | – weight fraction (unitless)                                                               |
| $H$            | – binding enthalpy ( $\text{kcal mol}^{-1}$ )                                              |
| $I$            | – integrated FTIR peaks (unitless)                                                         |
| $k$            | – rate constant ( $k_1$ : $\text{min}^{-1}$ ; $k_2$ : $\text{g mg}^{-1} \text{min}^{-1}$ ) |
| $K$            | – adsorption isotherm constant ( $K_L$ : $\text{L mg}^{-1}$ ; $K_F$ : $\text{mg g}^{-1}$ ) |
| $K_d$          | – distribution coefficient ( $\text{mL g}^{-1}$ )                                          |
| $L$            | – liquid; aqueous solution component (in $S/L$ ratio)                                      |
| $m$            | – mass (mg)                                                                                |
| $M$            | – metal (Li, Na, Mg, K, Ca)                                                                |
| $n$            | – number of measurements or trials                                                         |
| $n$            | – Freundlich adsorption intensity (unitless)                                               |
| $p$            | – pressure                                                                                 |
| $P$            | – porosity (%)                                                                             |
| $q$            | – adsorption capacity ( $\text{mg g}^{-1}$ )                                               |
| $r^2$          | – statistical coefficient of determination (unitless)                                      |
| $S$            | – solid; adsorbent component (in $S/L$ ratio)                                              |
| $S$            | – swelling ratio (unitless)                                                                |
| $t$            | – time (min or h)                                                                          |
| $T$            | – temperature ( $^{\circ}\text{C}$ )                                                       |
| $v$            | – volume (e.g. $v_{\text{pore}}$ , $\text{cm}^3 \text{g}^{-1}$ )                           |
| $V$            | – volume (mL or L)                                                                         |
| $w$            | – weight (mg)                                                                              |
| $l$            | – distance (nm)                                                                            |
| $N$            | – Avogadro's number                                                                        |

## Subscripts

|                 |                                                                           |
|-----------------|---------------------------------------------------------------------------|
| $o$             | – initial at $t = 0$                                                      |
| $1$             | – pristine MF (in Table S2)                                               |
| $2$             | – unwashed crosslinked MF (in Table S2)                                   |
| $3$             | – washed and dried cross-linked MF (in Table S2)                          |
| $ave$           | – average                                                                 |
| <i>Avogadro</i> | – Avogadro's number                                                       |
| <i>bulk</i>     | – density measured via dimensional measurement (in $\rho_{\text{bulk}}$ ) |

|                        |   |                                                               |
|------------------------|---|---------------------------------------------------------------|
| <i>c</i>               | – | CE cavity                                                     |
| <i>C</i>               | – | carbon                                                        |
| <i>C-CE</i>            | – | carbon from CE component                                      |
| <i>C-PVA</i>           | – | carbon from PVA component                                     |
| <i>CE_loss</i>         | – | CE eluted from fiber                                          |
| <i>e</i>               | – | equilibrium                                                   |
| <i>eluent</i>          | – | soaking deionized water                                       |
| <i>inner</i>           | – | inner diameter (in $\varnothing_{\text{inner}}$ )             |
| <i>F</i>               | – | Freundlich adsorption isotherm model                          |
| <i>L</i>               | – | Langmuir adsorption isotherm model                            |
| <i>m</i> or <i>max</i> | – | maximum                                                       |
| <i>n</i>               | – | number of surrounding H <sub>2</sub> O molecules (in Eq. 11). |
| <i>out</i>             | – | outer                                                         |
| <i>P</i>               | – | characteristic FTIR peaks                                     |
| <i>pore</i>            | – | pores in MF samples                                           |
| <i>PVA_loss</i>        | – | PVA eluted from fiber                                         |
| <i>t</i>               | – | time (min)                                                    |
| <i>theo</i>            | – | theoretical                                                   |
| <i>true</i>            | – | density measured via pycnometer (in $\rho_{\text{true}}$ )    |
| <i>UV-Vis</i>          | – | measured by UV-Vis spectrophotometry                          |

#### *Superscripts*

|           |   |                                  |
|-----------|---|----------------------------------|
| <i>n+</i> | – | cation charge number (1,2)       |
| <i>'</i>  | – | actual ( <i>f'</i> , <i>m'</i> ) |

#### *Abbreviations*

|           |   |                                                |
|-----------|---|------------------------------------------------|
| BET       | – | Brunauer, Emmett and Teller                    |
| CE        | – | Crown ether                                    |
| <i>CF</i> | – | Concentration factor (L g <sup>-1</sup> )      |
| CI        | – | Cranston-Inkley model                          |
| DFT       | – | Density functional theory                      |
| PBE       | – | Perdew-Burke-Ernzerhof                         |
| PAW       | – | Projector augmented wave                       |
| DI        | – | Deionized                                      |
| FESEM     | – | Field Emission Scanning Electron Microscope    |
| FTIR      | – | Fourier-transform infrared spectroscopy        |
| GA        | – | Glutaraldehyde                                 |
| ICP-MS    | – | Inductively coupled plasma mass spectrometry   |
| LIS       | – | Lithium ion sieve                              |
| MWCNT     | – | Multi-walled carbon nanotube                   |
| mCE       | – | Methylated crown ether                         |
| MF        | – | Microfiber                                     |
| PVA       | – | Poly(vinyl alcohol)                            |
| PSD       | – | Pore size distribution                         |
| RBF       | – | Round bottom flask                             |
| SA        | – | Surface area (m <sup>2</sup> g <sup>-1</sup> ) |

|               |   |                                                                                                           |
|---------------|---|-----------------------------------------------------------------------------------------------------------|
| SS            | – | Solid-state                                                                                               |
| CP-MAS        | – | Cross-polarization-magic angle spinning                                                                   |
| NMR           | – | Nuclear magnetic resonance spectroscopy                                                                   |
| TOC           | – | Total organic carbon                                                                                      |
| 2HDB14<br>C4  | – | 6,7,8,15,16,17-hexahydrodibenzo [1,4,8,11] tetraoxacyclotetradecine-7,16-diol (CE 1)                      |
| 2HB2M1<br>5C4 | – | 7,7-dimethyl-3,4,6,7,8,10,11,12-octahydro- 2H benzo [1,4,8,12] tetraoxa-cyclopentadecine-3,11-diol (CE 2) |
| 2HB16C4       | – | 2,3,4,6,7,8,9,11,12,13-decahydrobenzo[1,4,8,13] tetraoxacyclohexadecine-3,12-diol (CE 3)                  |

## References:

1. Zaagsma, J.; Nauta, W.Th.  $\beta$ -Adrenoceptor Studies. 1. In Vitro  $\beta$ -Adrenergic Blocking, Antiarrhythmic, and Local Anaesthetic Activities of a New Series of Aromatic Bis(2-hydroxy-3-isopropylaminopropyl) Ethers. *J. Med. Chem.* **1974**, *17*, 507-513.
2. Olsher, U.; Frolow, F.; Shoham, G.; Luboch, E.; Yu, Z.Y.; Bartsch, R.A. Synthesis and Selectivity of sym-Hydroxydibenzo-14-Crown-4 Ionophores for Protons, Alkali Metal Cations, and Alkaline Earth Cations in Polymeric Membranes. *J. Incl. Phenom. Mol. Recognit. Chem.* **1990**, *9*, 125-135.
3. Nakatsuji, Y.; Tsuji, Y.-I.; Ikeda, I.; Okahara, M. Reactions of Oligoethylene Glycol Diglycidyl Ethers with Hydroxy Compounds. *J. Org. Chem.* **1986**, *51*, 78-81.
4. Destaye, A.G.; Lin, C.-K.; Lee, C.-K. Glutaraldehyde Vapor Cross-linked Nanofibrous PVA Mat with in Situ Formed Silver Nanoparticles. *ACS Appl. Mater. Interfaces* **2013**, *5*, 4745-4752.
5. dos Reis, E.F.; Campos, F.S.; Lage, A.P.; Leite, R.C.; Heneine, L.G.; Vasconcelos, W.L.; Lobato, Z.I.P.; Mansur, H.S. Synthesis and Characterization of Poly (Vinyl Alcohol) Hydrogels and Hybrids for rMPB70 Protein Adsorption. *Mat. Res.* **2006**, *9*, 185-191.
6. Nakanishi, K.; Solomon, K. *Infrared Absorption Spectroscopy*, 2nd ed; Holden-Day: Oakland, California, USA, 1977.
7. Tas, S.; Kaynan, O.; Ozden-Yenigun, E.; Nijmeijer, K. Polyacrylonitrile (PAN)/Crown Ether Composite Nanofibers for the Selective Adsorption of Cations. *RSC Adv.* **2016**, *6*, 3608-3616.
8. Yeom, C.-K.; Lee, K.-H. Pervaporation Separation of Water-Acetic Acid Mixtures through Poly (Vinyl Alcohol) Membranes Crosslinked with Glutaraldehyde. *J. Memb. Sci.* **1996**, *109*, 257-265.
9. Moore, T.T.; Koros, W.J. Gas Sorption in Polymers, Molecular Sieves, and Mixed Matrix Membranes. *J. Appl. Polym. Sci.* **2007**, *104*, 4053-4059.
10. Nisola, G.M.; Limjuco, L.A.; Vivas, E.L.; Lawagon, C.P.; Park, M.J.; Shon, H.K.; Mittal, N.; Nah, I.W.; Kim, H.; Chung, W.-J. Macroporous Flexible Polyvinyl Alcohol Lithium Adsorbent Foam Composite Prepared via Surfactant Blending and Cryo-Desiccation. *Chem. Eng. J.* **2015**, *280*, 536-548.
11. Togrul, M.; Turgut, Y.; Hosgoren, H. Enantioselective Recognition of Ammonium Perchlorate Salts by Optically Active Monoaza-15-crown-5 Ethers. *Chirality* **2004**, *16*, 351-355.
12. Postulkova, H. Chemical modifications of hydrogels from natural polysaccharide. Master's Thesis, Brno University of Technology, Brno, Czech Republic, 2014.

13. An, Y.; Koyama, T.; Hanabusa, K.; Shirai, H. Preparation and Properties of Highly Phosphorylated Poly (Vinyl Alcohol) Hydrogels Chemically Crosslinked by Glutaraldehyde. *Polym.* **1995**, *36*, 2297-2301.
14. Hagiopol, C.; Johnston, J.W. *Chemistry of Modern Papermaking*; CRC Press: Florida, USA, 2011.
15. Buchanan, G.W.; Kirby, R.A.; Charland, J.P. Stereochemistry of Crown Ethers and Their Complexes in the Solid State.  $^{13}\text{C}$  CPMAS NMR and X-ray Crystallographic Studies of Configurationally Isomeric Dicyclohexano-14-Crown-4 Ethers, Dibenzo-14-Crown-4 Ether, and Some Lithium Thiocyanate Salts. *J. Am. Chem. Soc.* **1988**, *110*, 2477-2483.
16. Li, Z.; Wang, C. *Electrospinning in One-Dimensional Nanostructures*; Springer: Germany, 2013.
17. Amiraliyan, N.; Nouri, M.; Kish, M.H. Structural Characterization and Mechanical Properties of Electrospun Silk Fibroin Nanofiber Mats. *Polym. Sci. Ser. A.* **2010**, *52*, 407–412.
18. Yoshizuka, K.; Kitajou A.; Holba, M. Selective Recovery of Lithium from Seawater using a Novel  $\text{MnO}_2$  Type Adsorbent III – Benchmark Evaluation. *Ars Separatoria Acta* **2006**, *4*, 78-85.
19. Wang, L.; Meng, C.; Ma, W. Preparation of Lithium Ion-Sieve and Utilizing in Recovery of Lithium from Seawater. *Front. Chem. Eng. China.* **2009**, *3* (1), 65-67.
20. Chitrakar, R.; Kanoh, H.; Miyai, Y.; Ooi, K. Recovery of Lithium from Seawater Using Manganese Oxide Adsorbent ( $\text{H}_{1.6}\text{Mn}_{1.6}\text{O}_4$ ) Derived from  $\text{Li}_{1.6}\text{Mn}_{1.6}\text{O}_4$ . *Ind. Eng. Chem. Res.* **2001**, *40* (9), 2054-2058.
21. Chitrakar, R.; Kanoh, H.; Miyai, Y.; Ooi, K. A New Type of Manganese Oxide ( $\text{MnO}_2 \cdot 0.5\text{H}_2\text{O}$ ) Derived from  $\text{Li}_{1.6}\text{Mn}_{1.6}\text{O}_4$  and Its Lithium Ion-Sieve Properties. *Chem. Mater.* **2000**, *12*, 3151-3157.
22. Xiao, J.L.; Sun, S.Y.; Wang, J.; Li, P.; Yu, J.G. Synthesis and Adsorption Properties of  $\text{Li}_{1.6}\text{Mn}_{1.6}\text{O}_4$  Spinel. *Ind. Eng. Chem. Res.* **2013**, *52*, 11967-11973.
23. Wajima, T.; Munakata, K.; Uda, T. Adsorption Behavior of Lithium from Seawater using Manganese Oxide Adsorbent. *Plasma Fusion Res.* **2012**, *7*, 2405021.
24. Lawagon, C.P.; Nisola, G.M.; Mun, J.Y.; Tron, A.; Torrejos, R.E.C.; Seo, J.G.; Kim, H.; Chung, W.-J. Adsorptive  $\text{Li}^+$  Mining from Liquid Resources by  $\text{H}_2\text{TiO}_3$ : Equilibrium, Kinetics, Thermodynamics, and Mechanisms. *J. Ind. Eng. Chem.* **2016**, *35*, 347-356.
25. Hong, H.J.; Park, I.S.; Ryu, T.G.; Ryu, J.H.; Kim, B.G.; Chung, K.S. Granulation of  $\text{Li}_{1.33}\text{Mn}_{1.67}\text{O}_4$  (LMO) through the use of Cross-Linked Chitosan for the Effective Recovery of  $\text{Li}^+$  from Seawater. *Chem. Eng. J.* **2013**, *234*, 16-22.

26. Umeno, A.; Miyai, Y.; Takagi, N.; Chitrakar, R.; Sakane, K.; Ooi, K. Preparation and Adsorptive Properties of Membrane-Type Adsorbents for Lithium Recovery from Seawater. *Ind. Eng. Chem. Res.* **2002**, *41*, 4281–4287.
27. Zhu, G.; Wang, P.; Qi, P.; Gao, C. Adsorption and Desorption Properties of Li<sup>+</sup> on PVC-H<sub>1.6</sub>Mn<sub>1.6</sub>O<sub>4</sub> Lithium Ion-Sieve Membrane. *Chem. Eng. J.* **2014**, *235*, 340–348.
28. Park, M.J.; Nisola, G.M.; Beltran, A.B.; Torrejos, R.E.C.; Seo, J.G.; Lee, S.-P.; Kim, H.; Chung, W.-J. Recyclable Composite Nanofiber Adsorbent for Li<sup>+</sup> Recovery from Seawater Desalination Retentate. *Chem. Eng. J.* **2014**, *254*, 73–81.
29. Ma, L.W.; Chen, B.Z.; Chen, Y.; Shi, X.C. Preparation, Characterization and Adsorptive Properties of Foam-Type Lithium Adsorbent. *Micropor. Mesopor. Mat.* **2011**, *142*, 147–153.
30. Han, Y.S.; Kim, H.J.; Park, J.K. Millimeter-Sized Spherical Ion-Sieve Foams with Hierarchical Pore Structure for Recovery of Lithium from Seawater. *Chem. Eng. J.* **2012**, *210*, 482–489.
31. Kim, J.H.; Oh, S.H.; Kwak, S.Y. Magnetically Separable Magnetite-Lithium Manganese Oxide Nanocomposites as Reusable Lithium Adsorbents in Aqueous Lithium Resources. *Chem. Eng. J.* **2015**, *281*, 541–548.
32. Xiao, G.; Tong, K.; Zhuo, J.; Xiao, J.; Sun, S.; Li, P.; Yu, J. Adsorption and Desorption Behavior of Lithium Ion in Spherical PVC-MnO<sub>2</sub> Ion Sieve. *Ind. Eng. Chem. Res.* **2012**, *51*, 10921–10929.
33. Limjuco, L.A.; Nisola, G.M.; Lawagon, C.P.; Lee, S.-P.; Seo, J.G.; Kim, H.; Chung, W.-J. H<sub>2</sub>TiO<sub>3</sub> Composite Adsorbent Foam for Efficient and Continuous Recovery of Li<sup>+</sup> from Liquid Resources. *Colloids Surf., A.* **2016**, *504*, 267–279.
34. Hankins, M.G.; Hayashita, T.; Kasprzyk, S.P.; Bartsch, R.A.; Immobilization of Crown Ether Carboxylic Acids on Silica Gel and Their Use in Column Concentration of Alkali Metal Cations from Dilute Aqueous Solutions. *Anal. Chem.* **1996**, *68*, 2811–2817.
35. Park, S.S.; Moorthy, M.S.; Song, H.-J.; Ha, C.-S. Functionalized Mesoporous Silicas with Crown Ether Moieties for Selective Adsorption of Lithium Ions in Artificial Sea Water. *J. Nanosci. Nanotechnol.* **2014**, *14*, 8845–8851.
36. Luo, X.; Guo, B.; Luo, J.; Deng, F.; Zhang, S.; Luo, S.; Crittenden, J. Recovery of Lithium from Wastewater Using Development of Li Ion-Imprinted Polymers, *ACS Sustainable Chem. Eng.* **2015**, *3*, 460–467.
37. Torrejos, R.E.C.; Nisola, G.M.; Park, M.J.; Shon, H.K.; Seo, J.G.; Koo, S.H.; Chung, W.-J. Synthesis and Characterization of Multi-Walled Carbon Nanotubes-Supported Dibenzo-14-Crown-4 Ether with Proton Ionizable Carboxyl Sidearm as Li<sup>+</sup> Adsorbents. *Chem. Eng. J.* **2015**, *264*, 89–98.

38. Alexandratos, S.D.; Stine, C.L.; Sachleben, R.A.; Moyer, B.A.; Immobilization of Lithium-Selective 14-Crown-4 on Crosslinked Polymer Supports. *Polym.* **2005**, *46*, 6347–6352.
39. Zhou, W.; Sun, X.-L.; Gu, L.; Bao, F.-F.; Xu, X.-X.; Pang, C.-Y.; Gu, Z.-G.; Li, Z. A Green Strategy for Lithium Isotopes Separation by Using Mesoporous Silica Materials Doped with Ionic Liquids and Benzo-15-Crown-5. *J. Radioanal. Nucl. Chem.* **2014**, *300*, 843-852.
40. Pethrick, R.A.; Wilson, M.J.; Affrossman, S.; Holmes, D.; Lee, W.M. Synthesis and Cation Complexation Properties of Crown Ether Polyamic Acids/Imides. *Polym.* **2000**, *41*, 7111–7121.
41. Hayashita, T.; Goo, M.-J.; Lee, J.C.; Kim, J.S.; Krzykawski, J.; Bartsch, R.A.; Selective Sorption of Alkali-Metal Cations by Carboxylic Acid Resins Containing Acyclic or Cyclic Polyether Units. *Anal. Chem.* **1990**, *62*, 2283-2287.
42. Boda, A.; Ali, Sk.M.; Shenoi, M.R.K.; Rao, H.; Ghosh, S.K. DFT Modeling on the Suitable Crown Ether Architecture for Complexation with Cs<sup>+</sup> and Sr<sup>2+</sup> Metal Ions, *J. Mol. Model.* **2011**, *17*, 1091–1108.
43. Yu, H.; Whitfield, T.W.; Harder, E.; Lamoureux, G.; Vorobyov, I.; Anisimov, V.M.; MacKerell, Jr., A.D.; Roux, B. Simulating Monovalent and Divalent Ions in Aqueous Solution Using a Drude Polarizable Force Field. *J. Chem. Theory Comput.* **2010**, *6*, 774–786.
